## 1 Calponin-Homology Domain mediated bending of membrane associated actin 2 filaments

3  
4  
5 Saravanan Palani, Mohan K. Balasubramanian\*, and Darius V. Köster\*

6  
7 Centre for Mechanochemical Cell Biology and Warwick Medical School, Division of Biomedical Sciences, CV4  
8 7AL Coventry, UK

9 \* Corresponding authors: [M.K.Balasubramanian@warwick.ac.uk](mailto:M.K.Balasubramanian@warwick.ac.uk), [D.Koester@warwick.ac.uk](mailto:D.Koester@warwick.ac.uk)

10  
11  
12 **Actin filaments are central to numerous biological processes in all domains of life. Driven by the interplay with molecular motors, actin binding and actin modulating proteins, the actin cytoskeleton exhibits a variety of geometries. This includes structures with a curved geometry such as axon-stabilizing actin rings, actin cages around mitochondria and the cytokinetic actomyosin ring, which are generally assumed to be formed by short linear filaments held together by actin cross-linkers. However, whether individual actin filaments in these structures could be curved and how they may assume a curved geometry remains unknown. Here, we show that “curly”, a region from the IQGAP family of proteins from three different organisms, comprising the actin-binding calponin-homology domain and a C-terminal unstructured domain, stabilizes individual actin filaments in a curved geometry when anchored to lipid membranes. Whereas F-actin is semi-flexible with a persistence length of ~10  $\mu\text{m}$ , binding of mobile curly within lipid membranes generates actin filament arcs and full rings of high curvature with radii below 1  $\mu\text{m}$ . Higher rates of fully formed actin rings are observed in the presence of the actin-binding coiled-coil protein tropomyosin, and also when actin is directly polymerized on lipid membranes decorated with curly. Strikingly, curly induced actin filament rings contract upon the addition of muscle myosin II filaments and expression of curly in mammalian cells leads to highly curved actin structures in the cytoskeleton. Taken together, our work identifies a new mechanism to generate highly curved actin filaments, which opens a new range of possibilities to control actin filament geometries, that can be used, for example, in designing synthetic cytoskeletal structures.**

13  
14  
15  
16  
17  
18  
19  
20  
21  
22  
23  
24  
25  
26  
27  
28  
29  
30  
31  
32  
33  
34  
35  
36 The IQGAP family of proteins plays a key role in actin cytoskeleton regulation including the assembly and function of the contractile actomyosin ring in budding and fission yeasts (Briggs & Sacks, 2003; Eng et al., 1998; Epp & Chant, 1997; Tebbs et al., 2013). To study the mechanism and role of actin binding by the fission yeast IQGAP (encoded by the *mg2* gene), we utilized a strategy to investigate its function when immobilized on supported lipid bilayers. We chose this approach, since during cytokinesis Rng2, which binds a number of actomyosin ring proteins, is tethered to the plasma membrane via Mid1 ensuring the formation and anchoring of the cytokinetic ring (Laplante et al., 2016; Laporte et al., 2011; Padmanabhan et al., 2011). We linked hexa-histidine tagged *mg2* protein fragments to supported lipid bilayers containing nickel-chelating lipids (DOGS-NTA( $\text{Ni}^{2+}$ )) and observed the binding of fluorescently labelled actin filaments using live total internal reflection fluorescence (TIRF) microscopy as described earlier (Köster et al., 2016) (Figure 1A). The actin-binding calponin homology domain (CHD) is located at the N-terminus of Rng2 (AA 41-147), and the construct His<sub>6</sub>-Rng2[1-189] (subsequently referred to as curly) containing the CHD and additional 42 amino acids was found to bind actin filaments (Figure 1B, Figure 1-figure supplement 1A-C). Remarkably, when bound to His<sub>6</sub>-Curly a large fraction of actin filaments formed tightly bent rings ( $21 \pm 5$  rings per field of view) with a characteristic curvature  $C_{\text{curly}} = 1.7 \pm 0.5 \mu\text{m}^{-1}$  ( $N = 425$ ) (Figure 1 C; Figure 1 – figure supplement 1 D; Video 1). To our knowledge, this is an unprecedented phenomenon specific to curly. Binding of other membrane attached actin binding proteins in the same geometry does not appreciably bend actin ( $C_{\alpha\text{-actinin}} = 0.3 \pm 0.1 \mu\text{m}^{-1}$ ,  $N = 85$ ;  $C_{\text{EzrinABD}} = 0.5 \pm 0.3 \mu\text{m}^{-1}$ ,  $N = 127$ ) (Figure 1-figure supplement 2 A-D). Membrane anchored fimbrin has also been shown not to bend actin (Murrell & Gardel, 2012).

60 To understand the mechanism leading to actin filament bending and ring formation by curly,  
61 we tested the role of different fragments of curly and their orientation as well as curly  
62 anchoring to lipid membranes in actin filament bending. Curly mobility within planar lipid  
63 membranes was important for actin bending as glass adsorbed, immobilized His<sub>6</sub>-Curly  
64 displayed reduced actin bending and ring formation ( $C_{\text{glass}} = 0.6 \pm 0.3 \mu\text{m}^{-1}$ ,  $N = 138$ ) (Figure  
65 2 A, F), and when using membrane tethered fluorescently labelled His<sub>6</sub>-SNAP-curly, a weak  
66 accumulation of curly under actin filaments could be observed (Figure 2-figure supplement  
67 1). Next, we generated fragments of curly to discern the regions important for actin binding  
68 and bending. We found that the C-terminal region following the CHD (His6-Rng2[150-250])  
69 alone was able to bind actin filaments without inducing bending ( $C_{[150-250]} = 0.2 \pm 0.1 \mu\text{m}^{-1}$ ,  $N$   
70  $= 17$ ) (Figure 2 B). Interestingly, a 7AA deletion (Rng2[1-189]- $\Delta$ (154-160)) led to a reduced  
71 degree of actin binding and bending ( $C_{\Delta(154-160)} = 0.4 \pm 0.1 \mu\text{m}^{-1}$ ,  $N = 33$ ) (Figure 2 C).  
72 Similarly, the fragments Rng2[41-189] and Rng2[1-147] displayed weaker actin binding and  
73 bending compared to curly ( $C_{[41-189]} = 0.6 \pm 0.2 \mu\text{m}^{-1}$ ,  $N = 323$ ;  $C_{[1-147]} = 0.7 \pm 0.2 \mu\text{m}^{-1}$ ,  $N =$   
74  $118$ ) (Figure 2 D, E). The location of the hexa-histidine tag to link curly to the lipid membrane  
75 (C-terminal hexa-histidine tagged construct Rng2[1-189]-His<sub>6</sub>) did not affect actin filament  
76 bending ( $25 \pm 7$  rings per field of view;  $C_{\text{curly-his}} = 1.5 \pm 0.5 \mu\text{m}^{-1}$ ,  $N = 184$ ) (Figure 2 F). Taken  
77 together (Figure 2 G), this suggests that curly contains two actin binding sites, one located  
78 within the CHD followed by a second within Rng2[148-189]. Both actin binding sites are  
79 necessary for actin bending as neither Rng2[1-147] nor Rng2[150-250] caused strong  
80 bending. It is very likely that the second actin binding site includes the 7AA Rng2[154-160]  
81 as this unstructured region maps directly to AA 240-246 of the dystrophin CH2 domain  
82 (Wang et al., 2004). The first 40 AA of Rng2 are likely to be important for the protein folding  
83 and stability, because of which the Rng2[41-189] construct showed poor actin binding and  
84 did not lead to actin bending.

85  
86 Careful examination of individual actin filaments bound to membrane tethered His<sub>6</sub>-Curly  
87 allowed us to identify the occurrence of discrete kinks of an angle  $\alpha = 37^\circ \pm 8^\circ$  ( $N = 63$ ) along  
88 actin filaments during the transition from straight to bent filaments (Figure 2-figure  
89 supplement 2 A, B; Video 2). Based on the experimental data and the predicted molecular  
90 structure of curly (Rng2[1-189]) we hypothesize that i) the CHD (Rng2[41-147]) contains at  
91 least one actin binding site (similar to the utrophin actin binding domains ABD2' (UTRN[84-  
92 94]) and ABD2 (UTRN[107-126]) (Kumari et al., 2020)) and ii) the C-terminal extension from  
93 the CHD contains an additional actin binding site (including Rng2[154-160]) (Wang et al.,  
94 2004). The latter could lead to a change in the actin subunit orientation within the actin  
95 filament similar to the action of cofilin (Narita, 2020) and could lead to overall actin bending  
96 when the binding is asymmetric (Figure 2-figure supplement 2 C). However, in contrast to  
97 cofilin, we could not observe any events actin filament severing by curly.

98  
99 Next, we studied whether actin bending by curly depended on the orientation of actin  
100 filaments by following the landing of actin filaments decorated with labelled capping protein  
101 as a plus end marker (Bieling et al., 2016). We found that the bending was oriented anti-  
102 clockwise with respect to the plus end in all instances where the plus end was clearly  
103 labelled and the orientation of filament bending could be identified (Figure 3A, B; Figure 3-  
104 figure supplement 1 A, B). This was observed using both, the N-terminal and C-terminal  
105 hexa-histidine tagged curly indicating that the internal sequence of the two actin binding  
106 sites within curly sets the chirality of actin bending and not the position of the membrane  
107 linker (Figure 3A, B; Figure 3-figure supplement 1 A, B; Video 3, 4). Actin filaments  
108 appeared to bend concomitant with their landing on the supported lipid bilayer, which  
109 indicates that the bending did not require the full actin filament to be tethered to the SLB and  
110 underlined the earlier observation that the bending occurred locally.

111  
112 To decouple the actin filament bending from the landing of actin filaments, we induced  
113 polymerization of actin filaments at planar lipid membranes in the presence of membrane  
114 tethered curly (His<sub>6</sub>-Curly) by using membrane tethered formin (His<sub>6</sub>-SpCdc12(FH1-FH2)),  
115 profilin-actin and ATP. Strikingly, polymerizing actin filaments displayed characteristic  
116 bending shortly after the onset of polymerization and grew often into full rings ( $44 \pm 6$  rings  
117 per field of view,  $C_{\text{formin rings}} = 1.7 \pm 0.4 \mu\text{m}^{-1}$ ,  $N = 477$ ;  $C_{\text{formin short}} = 1.1 \pm 0.3 \mu\text{m}^{-1}$ ,  $N = 125$ )

118 (Figure 3 C, D; Figure 3-figure supplement 1 C, D; Video 5). By contrast, polymerization of  
119 actin filaments along SLBs decorated with His<sub>10</sub>-SNAP-EzrinABD did not result in the  
120 formation of arcs and rings, establishing that actin filament bending was due to curly and not  
121 due to formin (Figure 3-figure supplement 1 E, F). These observations showed that actin  
122 bending occurs continuously due to the binding of membrane tethered curly and did not  
123 require the cross-linking of adjacent ends of the same filament as was observed with the  
124 actin cross-linker anillin (Kučera et al., 2020). Importantly, the uni-directional bending  
125 supports the hypothesis that the binding site of curly with actin filaments defines an  
126 orientation, and the propagation of a curved trajectory once established indicates a  
127 cooperative process.

128  
129 Actin filaments forming the cytokinetic ring in *S. pombe* are wrapped by the coiled-coil  
130 protein tropomyosin (Cdc8), while the actin cross-linker fimbrin is present outside the  
131 cytokinetic ring region in Arp2/3 generated actin patches and prevents tropomyosin of  
132 binding to actin filaments in these patches (Skau & Kovar, 2010). To find out whether the  
133 actin bending effect of curly is conserved in tropomyosin wrapped actin filaments, we  
134 incubated actin filaments with tropomyosin before adding them to His<sub>6</sub>-Curly containing  
135 SLBs. Strikingly, addition of tropomyosin to actin filaments increased the frequency of actin  
136 ring formation without affecting actin filament curvature ( $38 \pm 3$  rings per field of view;  
137  $C_{\text{tropomyosin}} = 1.4 \pm 0.6 \mu\text{m}^{-1}$ , N = 204), while actin filaments incubated with the actin cross-  
138 linker fimbrin displayed reduced bending and ring formation ( $3 \pm 2$  rings per field of view;  
139  $C_{\text{fimbrin}} = 0.6 \pm 0.4 \mu\text{m}^{-1}$ , N = 407) (Figure 3-figure supplement 2 A-E; Video 6). Thus, the  
140 tropomyosin Cdc8 and curly cooperate to enhance actin filament bending and ring formation.

141  
142 Interestingly, we could observe that long actin filaments coated with tropomyosin would trace  
143 consecutive rings around the same center while landing on curly decorated lipid  
144 membranes. Subtraction of the image after completion of the first round of actin filament  
145 landing into a ring from the image after the second round revealed that the second ring  
146 occupied the interior space of the first ring. In line with that, comparison of the intensity  
147 profiles perpendicular to the actin filament of the first and second round of ring formation  
148 revealed a widening of the profile towards the interior of the ring (Figure 3-figure supplement  
149 3 A, B). A similar effect could be observed in examples of actin filaments polymerized by  
150 membrane tethered formin in the presence of membrane tethered curly (Figure 3-figure  
151 supplement 3 C, D). This would suggest that curly can arrange long actin filaments into an  
152 inward oriented spiral.

153  
154 To test whether the curly-induced actin rings can contract, we added rabbit skeletal muscle  
155 myosin II filaments and ATP to curly bound actin filaments and followed actin filament  
156 dynamics over time. After the myosin II filaments landed on the actin filaments, straight actin  
157 filaments were propelled by myosin action and eventually started to bend and displayed a  
158 variety of dynamics including translation, rotation and finally contraction of actin rings (Figure  
159 3 E, Figure 3-figure supplement 4 A, Video 7). Interestingly, most actin rings displayed a  
160 counter-clockwise rotation (34/36 cases) and the contraction was slow with  $V_{\text{contraction}} = 3 \pm$   
161  $0.7 \text{ nm s}^{-1}$  (N = 29) (Figure 3 F; Video 8). Despite reaching high curvatures of  $C_{\text{myosin}} = 2.8 \pm$   
162  $0.7 \mu\text{m}^{-1}$  (N = 342) with a maximum of  $6.3 \mu\text{m}^{-1}$  there was no evidence of breaking of actin  
163 filaments during the contraction process (Figure 3 G). Additionally, the myosin II induced  
164 flows of actin filaments increased the formation of actin rings significantly ( $79 \pm 8$  rings per  
165 field of view) indicating that myosin II filament induced actin filament sliding enhanced the  
166 ability of membrane anchored curly to generate actin filament bending (Figure 3-figure  
167 supplement 4 B, C). In line with this, actin filament rings displayed increased localization of  
168 fluorescently labelled curly after addition of myosin II filaments action indicating that curly  
169 showed an increased affinity for highly bent actin and/ or stabilized actin filaments at higher  
170 curvatures (Figure 3-figure supplement 4 D). Interestingly, despite the observed high  
171 curvatures of actin filaments upon myosin II filament action, severing of actin filament was  
172 not observed suggesting that binding of curly reduces the rigidity of actin filaments.

173  
174 It was not obvious that addition of myosin II filaments would lead to actin ring constriction  
175 without the addition of any cross-linkers or other factors. When taking into account that curly

176 arranges actin filaments into an inward spiral, a possible explanation for actin ring  
177 constriction would be that the myosin II filament acts both as a cross-linker and motor  
178 protein: one end of the myosin II filament sits at the actin filament plus end while other  
179 myosin head domains of the same myosin II filament pull along the same actin filament to  
180 travel towards the plus end leading to constriction (Figure 3-figure supplement 4 E). This  
181 would result in sub-optimal myosin head orientations towards the actin filament, which could  
182 explain the observed slow constriction rates that were orders of magnitude slower than the  
183 reported values for actin propulsion by myosin II in motility assays (Toyoshima et al., 1990).

184  
185 Since Rng2 belongs to the IQGAP protein family, we tested the N-terminal hexa-histidine  
186 tagged fragments of the IQGAP proteins Iqg1[1-330] (*S. cerevisiae*) and IQGAP1[1-678] (*H.*  
187 *sapiens*) and found that the bending of actin filaments was conserved ( $C_{S.C.} = 1.1 \pm 0.4 \mu\text{m}^{-1}$ ;  
188  $N = 110$ ;  $C_{H.S.} = 1.0 \pm 0.2 \mu\text{m}^{-1}$ ;  $N = 290$ ) (Figure 4 A-C). Comparison of the available crystal  
189 structures of *H. sapiens* IQGAP1[28-190] with *S. pombe* Rng2[32-190] indicates a high  
190 similarity between the two (Figure 4-figure supplement 1).

191  
192 Finally, to test the effect of curly on the actin cortex in cells, we expressed curly-EGFP in the  
193 mammalian cell lines HEK293T and RPE-1, which resulted in obvious changes in the actin  
194 cortex architecture with prominent occurrence of curved actin filaments and bundles with  
195 curvatures of  $C_{HEK293T} = 2.3 \pm 0.4 \mu\text{m}^{-1}$  ( $N = 91$  from 14 cells), and  $C_{RPE-1} = 1.9 \pm 0.6 \mu\text{m}^{-1}$  ( $N$   
196  $= 113$  from 11 cells) (Figure 4D-F). Co-expression with LifeAct-mCherry confirmed that  
197 EGFP-Curly bound to actin filaments in cells (Figure 4-figure supplement 2). These  
198 experiments established that curly could instructively reorganize actin filaments / networks  
199 into curved structures and rings.

200

201

## 202 Discussion

203

204 Our results show that the N-terminal CHD of IQGAP proteins induces actin filament bending  
205 when tethered to lipid membranes, which constitutes a new type of actin binding protein and  
206 could be an important link between actin and membrane geometries. Recently, Uyeda and  
207 colleagues reported that curly (Rng2[1-189]) in solution can induce kinks at random  
208 locations of the actin filament (Hayakawa et al., 2020). This together with our results  
209 indicates that curly that is constrained to a lipid membrane, would bind asymmetrically to  
210 actin filaments leading to a succession of kinks towards the same direction leading to curling  
211 of the actin filaments into rings in the plane of the lipid membrane. With an estimated His<sub>6</sub>-  
212 Curly surface density on SLBs of  $5000 \mu\text{m}^{-2}$  (Köster et al., 2016; Nye & Groves, 2008) the  
213 approximated curly to actin ratio would be 1:7 or higher. The mobility of curly on the SLB  
214 allowing accumulation under actin filaments was important for continuous actin filament  
215 bending into rings as glass-immobilized curly failed to generate rings. In line with this, curly  
216 in solution, i.e. in the absence of a substrate providing confinement, did not lead to  
217 persistent bending of actin filaments (Hayakawa et al., 2020). Interestingly, individual  
218 transient kinks of an average angle of  $37^\circ \pm 8^\circ$  could be observed during actin filament  
219 binding to curly, but it remained unclear whether this is caused by binding of single or  
220 multiple proteins. Based on the data of the Utrophin-CHD actin binding sites (Kumari et al.,  
221 2020) together with the newly identified actin binding region withing Rng2[150-189], the local  
222 change of the actin filament structure induced by curly could be similar to the effect of cofilin  
223 (Narita, 2020) allowing the formation of actin rings with curvatures that would be  
224 energetically unfavorable given the actin filament persistence length of  $10 \mu\text{m}$  (De La Cruz &  
225 Gardel, 2015). The increased flexibility of actin filaments is highlighted by the fact that  
226 addition of rabbit muscle myosin II filaments resulted in actin ring constriction without any  
227 evidence for filament rupture up to curvatures of  $6.3 \mu\text{m}^{-1}$  which is much higher than  
228 expected for actin alone (Taylor et al., 2000). This mechanism of actin ring formation stands  
229 out as it bends individual actin filaments in contrast to other reported systems that generate  
230 actin rings made of bundles of actin filaments (Litschel et al., 2020; Mavrakakis et al., 2014;  
231 Mishra et al., 2013; Way et al., 1995).

232

233 In case of *S. pombe* cytokinetic ring formation, Rng2 is localized at the plasma membrane  
234 by interaction with Mid1 via its C-terminal RAS-GAP and GRD domains (Almonacid et al.,  
235 2011; Padmanabhan et al., 2011) leaving the N-terminal CHD facing the cytoplasm and  
236 allowing interaction with actin filaments. Formin based polymerization of actin filaments is  
237 essential for cytokinetic ring formation and binding of the tropomyosin Cdc8 supports myosin  
238 driven cytokinetic ring contraction. Our work recapitulates that this minimal set of proteins  
239 can indeed generate and stabilize actin filaments of the right curvature to form the  
240 cytokinetic ring along the short axis of *S. pombe*. Even though electron microscopy data of  
241 the cytokinetic ring does not provide clear evidence of bent actin filaments (Swulius et al.,  
242 2018), this mechanism could work together with other processes such as cross-linkers  
243 ensuring the binding of fresh actin filaments along existing ones (Li & Munro, 2020) to drive  
244 robust formation of cytokinetic rings.

245  
246 Highly bent actin filament structures are most likely important for many cellular structures  
247 such as axons (Vassilopoulos et al., 2019; Xu et al., 2013) and mitochondrial actin cages  
248 (Kruppa et al., 2018), but the molecular mechanisms leading to their formation are still poorly  
249 understood. Future work could provide insights whether curly plays a role in actin ring  
250 formation in axons and around mitochondria. In addition, our system of membrane bound  
251 curly, actin filaments, and myosin II filaments constitutes a minimalistic system for actin ring  
252 formation and constriction and could be used in future to design synthetic dividing vesicles  
253 and further exiting active membrane-cortex systems.

254  
255

## 256 **Materials and Methods:**

257

### 258 **Cloning and Protein purification**

259

260 *S. pombe* Rng2 fragments, Fim1, Cdc12 (FH1-FH2) and *S. cerevisiae* Igg1 were amplified  
261 from cDNA library and genomic DNA respectively. Amplified fragments were cloned into pET  
262 (6His) and pGEX (GST) based vectors using Gibson cloning method (NEB builder, E5520S).  
263 Plasmids used in this study is listed in Table S1.

264

265 All protein expression plasmids were transformed into *E. coli* BL21-(DE3). Single colony was  
266 inoculated in 20 ml of LB media supplemented with appropriate antibiotic (pET-Kanamycin;  
267 pGEX-Ampicillin). Precultures were grown for ~12-16 h at 36 °C shaking at 200 r.p.m. Cells  
268 were diluted to OD600 of 0.1 a.u. in 500 ml of LB with antibiotics and protein expression was  
269 induced with 0.25 mM isopropyl  $\beta$ -D-1-thiogalactopyranoside (IPTG). Protein was expressed  
270 for 3-4 h at 30 °C shaking at 200 r.p.m. unless otherwise noted. After induction cell pellets  
271 were collected and spun down at 7,000 r.p.m for 20 minutes after induction at 4 °C. Media  
272 was aspirated and pellets were washed once with cold phosphate buffered saline (PBS) with  
273 1mM phenylmethylsulfonyl fluoride (PMSF), and pellets were stored at -80 °C.

274

275 His tagged protein (His6-Rng2, Igg1 and Iggap1) purification: Cell pellets for purification  
276 were thawed on ice for 10 minutes. The pellets were resuspended in 10 ml of lysis buffer for  
277 sonication (50 mM Napi pH 7.6, 200 mM NaCl, 10mM Imidazole pH 7.5, 0.5 mM EDTA,  
278 1 mM DTT, 1 mg/ ml lysozyme, and complete mini-EDTA-Free protease inhibitor cocktail  
279 tablets) and incubated on ice for 20 min, followed by sonication (8 cycles, 15 sec pulse). The  
280 lysates were centrifuged at 14000 r.p.m, 30 min, 4 °C and the clarified lysate was transferred  
281 to a 15-ml tube. The 400  $\mu$ l slurry of HisPur™ Ni-NTA agarose resin (cat. no. 88221, Thermo  
282 fisher) was washed with wash buffer (5x) (50 mM Napi (pH 7.6), 300 mM NaCl, 30mM  
283 Imidazole pH 7, 0.5 mM EDTA and 1 mM DTT) before the lysate was added. The clarified  
284 lysate was added to the washed Ni-NTA resin and incubated for 2h at 4 °C. After incubation  
285 with NiNTA resin, beads were washed with wash buffer 6-8 times in BIO-RAD prepacked  
286 column. Protein was eluted using Ni-NTA elution buffer (50 mM NaPi pH 7.6, 300 mM NaCl,  
287 0.5 mM EDTA, 1 mM DTT and 500 mM imidazole) and 300  $\mu$ l elutions were collected in a  
288 clean Eppendorf tubes. Each fraction was assessed by SDS-polyacrylamide gel  
289 electrophoresis (SDS-PAGE). The eluates (E1-E3) were pooled, concentrated and buffer  
290 exchanged into the protein storage buffer (50 mM Tris-HCl pH 7.4, 150 mM NaCl, 1 mM DTT

291 and 10% glycerol) using a PD MiniTrap G-25 sephadex columns (GE Healthcare) and the  
292 protein was stored at  $-80^{\circ}\text{C}$ . The protein concentration was estimated by UV280 and by  
293 comparing known quantities of BSA standards on an SDS-PAGE gel.

294  
295 GST tagged protein (GST-Fim1) purification: Cell pellets for purification were thawed on ice  
296 for 10 minutes. The pellets were resuspended in 10 ml of lysis buffer for sonication (PBS,  
297 0.5 mM EDTA, 1 mM DTT, 1 mg/ml lysozyme, and complete mini-EDTA-Free protease  
298 inhibitor cocktail tablets) and incubated on ice for 20 min, followed by sonication (10 cycles,  
299 15 sec pulse). After sonication cell lysate was incubated with 0.5% Triton-X-100 for 20  
300 minutes on ice. The lysates were centrifuged at 22000xg, 30 min,  $4^{\circ}\text{C}$  and the clarified  
301 lysate was transferred to a 15-ml tube. The 400  $\mu\text{l}$  slurry of glutathione sepharose-4B resin  
302 (cat. no. GE17-0756-01, GE) was washed with wash buffer (5x) (PBS, 0.5 mM EDTA and  
303 1 mM DTT) before the lysate was added. The clarified lysate was added to the washed  
304 glutathione sepharose resin and incubated for 2-3h at  $4^{\circ}\text{C}$ . After incubation with sepharose  
305 resin, beads were washed with wash buffer 6-8 times in poly-prep chromatography columns  
306 (BIO-RAD laboratories Inc). Protein was eluted using GST elution buffer (50 mM Tris-HCl  
307 pH8.0 and 10 mM glutathione). Purified protein sample was quantified and stored in the  
308 storage buffer as described above in the previous section.

309  
310 Acetylation mimicking version of tropomyosin (ASCdc8) was expressed in BL21-DE3 and  
311 protein was purified by boiling and precipitation method as described earlier (Palani et al.,  
312 2019; Skoumpla et al., 2007). Purified tropomyosin was dialyzed against the storage buffer  
313 (50 mM NaCl, 10 mM imidazole, pH 7.5, and 1 mM DTT), flash frozen in liquid N<sub>2</sub> and  
314 stored at  $-80^{\circ}\text{C}$ .

315  
316 SNAP labelling (SNAP-Surface® 549, S9112S, NEB) of capping protein-beta and Rng2 1-  
317 189 was performed as per the manufactures protocol.

### 318 319 **Co-sedimentation assay and Immunoblot**

320  
321 Co-sedimentation assays were performed at  $25^{\circ}\text{C}$  by mixing 3  $\mu\text{M}$  actin with different Rng2  
322 fragments, Sclqg1(1-330) and Hs IGAP1 (1-678), and then spun at 100,000 g (high speed)  
323 for 20 min at  $25^{\circ}\text{C}$ . Equal volumes of supernatant and pellet were separated by 12% SDS-  
324 PAGE gel and stained with Coomassie blue (SimplyBlueStain, Invitrogen) or immunoblotted.  
325 For western analysis, equal volumes of each sample were diluted in 1 x Laemmli buffer (Bio-  
326 Rad). Samples were run on a hand cast 10-well 12% acrylamide gels (Bio-Rad), transferred  
327 onto nitro cellulose membranes and blotted with 1:1000 Anti-His-HRP (6xHis Epitope TAG,  
328 Cat. no. sc-8036 HRP, Santa Cruz Inc) and 1:500 anti-actin-HRP (cat. no. sc-47778 HRP,  
329 Santa Cruz Inc). Signal was detected by enhanced chemiluminescence (Clarity western  
330 ECL, Bio-Rad) imaged on a ChemiDoc MP (Bio-Rad).

### 331 332 **Mammalian expression**

333  
334 *S. pombe* Rng2 fragment (1-189) was cloned into pCDNA3.1-eGFP using gibson cloning  
335 method. HEK293 and RPE1 cells were transiently transfected with pCDNA3 containing  
336 SpRng2 (1-189) using Lipofectamine 2000 (cat. no. 11668019, Life Technologies) following  
337 manufacturer's instructions. Cells were transfected at ~70% confluency for 24 h before the  
338 experiments. For each imaging condition, 500,000 cells were transfected with 1  $\mu\text{g}$  of DNA.  
339 Cells were seeded and imaged on  $\mu$ -Dish 35 mm (cat. no. 81156, IBIDI). Before imaging, the  
340 culture medium was replaced with phenol red-free DMEM (Opti-MEM, cat. no. 31985062,  
341 Life Technologies). Images were taken using spinning disk microscope with a 100x Apo  
342 objective, NA 1.4.

### 343 344 **In vitro assay and Total Internal Reflection Fluorescence (TIRF) microscopy**

#### 345 346 *Supported Lipid Bilayer and Experimental Chamber Preparation*

347 The sample preparation, experimental conditions and lipid composition were similar to the  
348 ones described in previous work [Koester et al, 2016]. Glass coverslips (#1.5 borosilicate,

349 Menzel, cat. no. 11348503, Fisher Scientific) for SLB formation were cleaned with  
350 Hellmanex III (Hellma Analytics, cat. No. Z805939, Merck) following the manufacturer's  
351 instructions followed by thorough rinses with EtOH and MilliQ water and blow dried with N<sub>2</sub>  
352 gas. For the experimental chamber, 0.2 ml PCR tubes (cat. no. I1402-8100, Starlab) were  
353 cut to remove the lid and conical bottom part. The remaining ring was stuck to the cleaned  
354 glass using UV glue (cat. no. NOA88, Norland Products) and three minutes curing by  
355 intense UV light at 265 nm (UV Stratalinker 2400, Stratagene). Freshly cleaned and  
356 assembled chambers were directly used for experiments.

357 Supported lipid bilayers (SLB) containing 98% DOPC (cat. no. 850375, Avanti Polar Lipids)  
358 and 2% DGS-NTA(Ni<sup>2+</sup>) (cat. no. 790404, Avanti Polar Lipids) lipids were formed by fusion  
359 of small uni-lamellar vesicles (SUV) that were prepared by lipid extrusion using a membrane  
360 with 100 nm pore size (cat. no. 610000, Avanti Polar Lipids). SLBs were formed by addition  
361 of 10  $\mu$ l of SUV mix (at 4 mM lipid concentration) to chambers filled with 90  $\mu$ l KMEH (50 mM  
362 KCl, 2 mM MgCl<sub>2</sub>, 1 mM EGTA, 20 mM HEPES, pH 7.2) and incubation for 30 min. Prior to  
363 addition of other proteins, the SLBs were washed 10 times by buffer exchange (always  
364 leaving 20  $\mu$ l on top of the SLB to avoid damage by drying). We tested the formation of lipid  
365 bilayers and the mobility of lipids in control samples by following the recovery of  
366 fluorescence signal after photobleaching of hexa-histidine tagged GFP (His<sub>6</sub>-GFP) as  
367 described in (Köster et al., 2016).

368

### 369 *Actin filament polymerization and tethering to SLBs*

370 Actin was purified from muscle acetone powder from rabbit (cat. no. M6890, Merck) and  
371 labelled with Alexa488-maleimide (cat. no. A10254, Thermo Fisher) following standard  
372 protocols (Köster et al., 2016; Pardee & Spudich, 1982).

373 In a typical experiment, actin filaments were polymerized in parallel to SLB formation to  
374 ensure that all components of the experiment were freshly assembled before starting  
375 imaging. First 10%<sub>vol</sub> of 10x ME buffer (100 mM MgCl<sub>2</sub>, 20 mM EGTA, pH 7.2) were mixed  
376 with unlabeled and labeled G-actin (to a final label ratio of 20%), optionally supplemented  
377 with labelled capping protein in G-actin buffer (1 mM CaCl<sub>2</sub>, 0.2mM ATP, 2mM Tris, 0.5 mM  
378 TCEP-HCl, pH 7.2) to a final G-actin concentration of 10  $\mu$ M and incubated for 2 min to  
379 replace G-actin bound Ca<sup>2+</sup> ions with Mg<sup>2+</sup> ions. Polymerization of actin filaments was  
380 induced by addition of an equal amount of 2x KMEH buffer supplemented with 2 mM Mg-  
381 ATP bringing the G-actin concentration to 5  $\mu$ M. After 30 min incubation time, actin filaments  
382 were added to the SLBs using blunt-cut pipette tips at a corresponding G-actin concentration  
383 of 100 nM (to ensure a homogenous mix of actin filaments, 2  $\mu$ l of actin filament solution was  
384 mixed in 18  $\mu$ l KMEH and then added to the SLB containing 80  $\mu$ l KMEH). After 10 min of  
385 incubation, His<sub>6</sub>-Curly or other variants of histidine-tagged actin binding proteins at a final  
386 concentration of 10 nM were added and a short time after (1 - 5 min) binding of actin to the  
387 SLB could be observed using TIRF microscopy.

388

389 In experiments with formin, the SLB was first incubated with 10 nM His<sub>6</sub>-SpCdc12(FH1-FH2)  
390 and 10 nM His<sub>6</sub>-Curly for 20 min, then washed twice with KMEH. During the incubation time,  
391 10%<sub>vol</sub> of 10x ME buffer was mixed with unlabeled and labeled G-actin at 4  $\mu$ M (final label  
392 ratio of 20%) together with 5  $\mu$ M profilin and incubated for 5 min prior to addition to the SLB  
393 and imaging with TIRF microscopy.

394

395 In experiments with tropomyosin or fimbrin, actin filaments ( $C_{G-actin} = 1 \mu$ M) were incubated  
396 with tropomyosin at a 1:3 protein concentration ratio or with fimbrin at a 3:2 protein  
397 concentration ratio for 15 min prior to addition to the SLB (Palani et al., 2019).

398

399 In experiments with muscle myosin II filaments, we prepared muscle myosin II filaments by  
400 diluting the stock of muscle myosin II proteins (rabbit, m. psoas, cat. no. 8326-01, Hypermol)  
401 ( $C_{myoII} = 20 \mu$ M; 500mM KCl, 1mM EDTA, 1 mM DTT, 10 mM HEPES, pH 7.0) 10-times with  
402 MilliQ water to drop the KCl concentration to 50 mM and incubated for 5 min to ensure  
403 myosin filament formation. Myosin II filaments were further diluted in KMEH to 200 nM and  
404 added to the actin filaments bound to the SLB by His<sub>6</sub>-Curly by replacing 1/10 of the sample  
405 buffer with the myosin II filament solution and supplemented with 0.1 mM Mg-ATP as well as  
406 a mix of 1 mM Trolox (cat. no. 648471, Merck), 2 mM protocatechuic acid (cat. no.

407 03930590, Merck) and 0.1  $\mu\text{M}$  protococatechuate 3,4-dioxygenase (cat. no. P8279, Merck) to  
408 minimize photobleaching. To summarize, the final buffer composition was 50mM KCl, 2mM  
409  $\text{MgCl}_2$ , 1mM EGTA, 20mM HEPES, 0.1mM ATP, 1 mM Trolox, 2 mM protococatechuic acid  
410 and 0.1  $\mu\text{M}$  protococatechuate 3,4-dioxygenase at pH 7.2 containing actin filaments ( $C_{\text{G-actin}} =$   
411 100 nM) and myosin II filaments ( $C_{\text{myoII}} = 20$  nM). It was important to keep the pH at 7.2, as  
412 changes in pH would affect motor activity. As reported earlier, myosin filaments started to  
413 show actin network remodeling activity after about 10-15 min of incubation (Köster et al.,  
414 2016; Mosby et al., 2020).

415  
416 *TIRF microscopy*

417 Images were acquired using a Nikon Eclipse Ti-E/B microscope equipped with perfect focus  
418 system, a Ti-E TIRF illuminator (CW laser lines: 488nm, 561nm and 640nm) and a Zyla  
419 sCMOS 4.2 camera (Andor, Oxford Instruments, UK) controlled by Andor iQ3 software  
420 (<https://andor.oxinst.com/products/iq-live-cell-imaging-software/>).

421  
422 **Image analysis**

423 Images were analyzed using ImageJ (<http://imagej.nih.gov/ij>).

424 Curvature was measured by fitting ellipses to match the actin filament contour by hand,  
425 while measuring first fully formed rings before curved actin filament segments and by going  
426 from the highest curvatures down to lower curvatures in each image with a cut off for  
427 measurements at curvatures smaller than  $0.1 \mu\text{m}^{-1}$  or at 30-40 measurements per image  
428 (see examples in Figure 1 – figure supplement 1D; Figure 1-figure supplement 2B).

429 To measure the angle of kinks in individual actin filaments, cropped images of individual  
430 actin filaments were processed with a Sobel filter (part of the Mosaic suit for ImageJ,  
431 <http://mosaic.mpi-cbg.de/?q=downloads/imagej>) to highlight the actin filament center, and  
432 the angles were measured manually with the ImageJ angle tool.

433 The actin ring contraction rate upon myosin II filament action was measured by generating  
434 kymographs based on a line (3 pixels width) dividing the ring into two equal halves.

435  
436 **Data plotting and statistics**

437 Graphs were generated using OriginPro (version 2019b, OriginLab, USA). Plots depict  
438 individual data points, mean (circle), median (central line) and standard deviation (top and  
439 bottom lines).

440  
441 **Acknowledgement**

442 The authors would like to thank Dr. Gayathri Panaghat (IISER Pune, India), Dr. Minhaj  
443 Sirajuddin (InStem, Bangalore, India), for insightful discussions and Prof. Gijssje Koenderink  
444 (TU Delft, Netherlands) and Prof. Rob Cross (University of Warwick, UK) for helpful  
445 comments on the manuscript. The work was supported by a Wellcome Investigator Award  
446 (WT 101885MA) and an ERC advanced grant (ERC-2014-ADG N° 671083) to MKB. DVK  
447 thanks the Wellcome-Warwick Quantitative Biomedicine Programme for funding  
448 (RMRCB0058).

449  
450 **Competing Interests**

451 The authors have no competing interests to declare.

452  
453  
454 **References**

455  
456 Almonacid, M., Celton-Morizur, S., Jakubowski, J. L., Dingli, F., Loew, D., Mayeux, A., Chen,  
457 J. S., Gould, K. L., Clifford, D. M., & Paoletti, A. (2011). Temporal control of contractile  
458 ring assembly by Plo1 regulation of myosin II recruitment by Mid1/anillin. *Current*  
459 *Biology*, 21(6), 473–479. <https://doi.org/10.1016/j.cub.2011.02.003>  
460 Bieling, P., Li, T.-D., Weichsel, J., McGorty, R., Jreij, P., Huang, B., Fletcher, D. A., &  
461 Mullins, R. D. (2016). Force Feedback Controls Motor Activity and Mechanical  
462 Properties of Self-Assembling Branched Actin Networks. *Cell*, 164(1–2), 115–127.  
463 <https://doi.org/10.1016/j.cell.2015.11.057>  
464 Briggs, M. W., & Sacks, D. B. (2003). IQGAP proteins are integral components of



- 465 cytoskeletal regulation. *EMBO Reports*, 4(6), 571–574.  
466 <https://doi.org/10.1038/sj.embor.embor867>
- 467 De La Cruz, E. M., & Gardel, M. L. (2015). Actin mechanics and fragmentation. *Journal of*  
468 *Biological Chemistry*, 290(28), 17137–17144. <https://doi.org/10.1074/jbc.R115.636472>
- 469 Eng, K., Naqvi, N. I., Wong, K. C. Y., & Balasubramanian, M. K. (1998). Rng2p, a protein  
470 required for cytokinesis in fission yeast, is a component of the actomyosin ring and the  
471 spindle pole body. *Current Biology*, 8(11), 611–621. [https://doi.org/10.1016/S0960-](https://doi.org/10.1016/S0960-9822(98)70248-9)  
472 [9822\(98\)70248-9](https://doi.org/10.1016/S0960-9822(98)70248-9)
- 473 Epp, J. A., & Chant, J. (1997). An IQGAP-related protein controls actin-ring formation and  
474 cytokinesis in yeast. *Current Biology*, 7(12), 921–929. [https://doi.org/10.1016/S0960-](https://doi.org/10.1016/S0960-9822(06)00411-8)  
475 [9822\(06\)00411-8](https://doi.org/10.1016/S0960-9822(06)00411-8)
- 476 Hayakawa, Y., Takaine, M., Imai, T., Yamada, M., Hirose, K., Tokuraku, K., Ngo, K. X.,  
477 Kodera, N., Numata, O., Nakano, K., & Uyeda, T. Q. P. (2020). Actin binding domain of  
478 Rng2 strongly inhibits actin movement on myosin II HMM through structural changes of  
479 actin filaments. *BioRxiv*.
- 480 Köster, D. V., Husain, K., Iljazi, E., Bhat, A., Bieling, P., Mullins, R. D., Rao, M., & Mayor, S.  
481 (2016). Actomyosin dynamics drive local membrane component organization in an in  
482 vitro active composite layer. *Proceedings of the National Academy of Sciences*,  
483 113(12), E1645–E1654. <https://doi.org/10.1073/pnas.1514030113>
- 484 Kruppa, A. J., Kishi-Itakura, C., Masters, T. A., Rorbach, J. E., Grice, G. L., Kendrick-Jones,  
485 J., Nathan, J. A., Minczuk, M., & Buss, F. (2018). Myosin VI-Dependent Actin Cages  
486 Encapsulate Parkin-Positive Damaged Mitochondria. *Developmental Cell*, 44(4), 484-  
487 499.e6. <https://doi.org/10.1016/j.devcel.2018.01.007>
- 488 Kučera, O., Janda, D., Siahhan, V., Dijkstra, S. H., Pilátová, E., Zatecka, E., Diez, S., Braun,  
489 M., & Lansky, Z. (2020). Anillin propels myosin-independent constriction of actin rings.  
490 *BioRxiv*, 1–27. <https://doi.org/10.1101/2020.01.22.915256>
- 491 Kumari, A., Kesarwani, S., Javoor, M. G., Vinothkumar, K. R., & Sirajuddin, M. (2020).  
492 Structural insights into actin filament recognition by commonly used cellular actin  
493 markers. *The EMBO Journal*, 846337. <https://doi.org/10.15252/embj.2019104006>
- 494 Laplante, C., Huang, F., Tebbs, I. R., Bewersdorf, J., & Pollard, T. D. (2016). Molecular  
495 organization of cytokinesis nodes and contractile rings by super-resolution fluorescence  
496 microscopy of live fission yeast. *Proceedings of the National Academy of Sciences*,  
497 113(40), E5876–E5885. <https://doi.org/10.1073/pnas.1608252113>
- 498 Laporte, D., Coffman, V. C., Lee, I. J., & Wu, J. Q. (2011). Assembly and architecture of  
499 precursor nodes during fission yeast cytokinesis. *Journal of Cell Biology*, 192(6), 1005–  
500 1021. <https://doi.org/10.1083/jcb.201008171>
- 501 Li, Y., & Munro, E. (2020). Existing actin filaments orient new filament growth to provide  
502 structural memory of filament alignment during cytokinesis. *BioRxiv*.  
503 <https://doi.org/10.1101/2020.04.13.039586>
- 504 Litschel, T., Kelley, C. F., Holz, D., Koudehi, M. A., Vogel, S. K., Burbaum, L., Mizuno, N.,  
505 Vavylonis, D., & Schwille, P. (2020). Reconstitution of contractile actomyosin rings in  
506 vesicles. *BioRxiv*. <https://doi.org/10.1101/2020.06.30.180901>
- 507 Mavrikakis, M., Azou-Gros, Y., Tsai, F.-C., Alvarado, J., Bertin, A., Iv, F., Kress, A., Bresselet,  
508 S., Koenderink, G. H., & Lecuit, T. (2014). Septins promote F-actin ring formation by  
509 crosslinking actin filaments into curved bundles. *Nature Cell Biology*, 16(4), 322–334.  
510 <https://doi.org/10.1038/ncb2921>
- 511 Mishra, M., Kashiwazaki, J., Takagi, T., Srinivasan, R., Huang, Y., Balasubramanian, M. K.,  
512 & Mabuchi, I. (2013). In vitro contraction of cytokinetic ring depends on myosin II but  
513 not on actin dynamics. *Nature Cell Biology*, 15(7), 853–859.  
514 <https://doi.org/10.1038/ncb2781>
- 515 Mosby, L. S., Hundt, N., Young, G., Fineberg, A., Polin, M., Mayor, S., Kukura, P., & Köster,  
516 D. V. (2020). Myosin II Filament Dynamics in Actin Networks Revealed with  
517 Interferometric Scattering Microscopy. *Biophysical Journal*, 118(8), 1946–1957.  
518 <https://doi.org/10.1016/j.bpj.2020.02.025>
- 519 Murrell, M. P., & Gardel, M. L. (2012). F-actin buckling coordinates contractility and severing  
520 in a biomimetic actomyosin cortex. *Proceedings of the National Academy of Sciences*  
521 *of the United States of America*, 19. <https://doi.org/10.1073/pnas.1214753109>
- 522 Narita, A. (2020). ADF/cofilin regulation from a structural viewpoint. *Journal of Muscle*

- 523        *Research and Cell Motility*, 41(1), 141–151. [https://doi.org/10.1007/s10974-019-09546-](https://doi.org/10.1007/s10974-019-09546-6)  
524        6
- 525 Nye, J. A., & Groves, J. T. (2008). Kinetic control of histidine-tagged protein surface density  
526        on supported lipid bilayers. *Langmuir: The ACS Journal of Surfaces and Colloids*,  
527        24(8), 4145–4149. <https://doi.org/10.1021/la703788h>
- 528 Padmanabhan, A., Bakka, K., Sevugan, M., Naqvi, N. I., D'Souza, V., Tang, X., Mishra, M.,  
529        & Balasubramanian, M. K. (2011). IQGAP-related Rng2p organizes cortical nodes and  
530        ensures position of cell division in fission yeast. *Current Biology*, 21(6), 467–472.  
531        <https://doi.org/10.1016/j.cub.2011.01.059>
- 532 Palani, S., Köster, D. V., Hatano, T., Kamnev, A., Kanamaru, T., Brooker, H. R., Hernandez-  
533        Fernaud, J. R., Jones, A. M. E., Millar, J. B. A., Mulvihill, D. P., & Balasubramanian, M.  
534        K. (2019). Phosphoregulation of tropomyosin is crucial for actin cable turnover and  
535        division site placement. *The Journal of Cell Biology*, jcb.201809089.  
536        <https://doi.org/10.1083/jcb.201809089>
- 537 Pardee, J. D., & Spudich, J. A. (1982). Purification of muscle actin. *Methods in Cell Biology*,  
538        24, 271–289. <http://www.ncbi.nlm.nih.gov/pubmed/7098993>
- 539 Skau, C. T., & Kovar, D. R. (2010). Fimbrin and tropomyosin competition regulates  
540        endocytosis and cytokinesis kinetics in fission yeast. *Current Biology*, 20(16), 1415–  
541        1422. <https://doi.org/10.1016/j.cub.2010.06.020>
- 542 Skoumpla, K., Coulton, A. T., Lehman, W., Geeves, M. A., & Mulvihill, D. P. (2007).  
543        Acetylation regulates tropomyosin function in the fission yeast *Schizosaccharomyces*  
544        *pombe*. *Journal of Cell Science*, 120(9), 1635–1645. <https://doi.org/10.1242/jcs.001115>
- 545 Swulius, M. T., Nguyen, L. T., Ladinsky, M. S., Ortega, D. R., Aich, S., Mishra, M., & Jensen,  
546        G. J. (2018). Structure of the fission yeast actomyosin ring during constriction.  
547        *Proceedings of the National Academy of Sciences of the United States of America*,  
548        115(7), E1455–E1464. <https://doi.org/10.1073/pnas.1711218115>
- 549 Taylor, K. A., Taylor, D. W., & Schachat, F. (2000). Isoforms of  $\alpha$ -actinin from cardiac,  
550        smooth, and skeletal muscle form polar arrays of actin filaments. *Journal of Cell*  
551        *Biology*, 149(3), 635–645. <https://doi.org/10.1083/jcb.149.3.635>
- 552 Tebbs, I. R., Pollard, T. D., & D, P. T. (2013). Separate roles of IQGAP Rng2p in forming  
553        and constricting the *Schizosaccharomyces pombe* cytokinetic contractile ring.  
554        *Molecular Biology of the Cell*, 24(12), 1904–1917. [https://doi.org/10.1091/mbc.E12-10-](https://doi.org/10.1091/mbc.E12-10-0775)  
555        0775
- 556 Toyoshima, Y. Y., Kron, S. J., & Spudicht, J. A. (1990). The myosin step size: Measurement  
557        of the unit displacement per ATP hydrolyzed in an in vitro assay  
558        (actin/crossbridge/muscle contraction). In *Proc. Natl. Acad. Sci. USA* (Vol. 87, Issue  
559        September).
- 560 Vassilopoulos, S., Gibaud, S., Jimenez, A., Caillol, G., & Leterrier, C. (2019). Ultrastructure  
561        of the axonal periodic scaffold reveals a braid-like organization of actin rings. *Nature*  
562        *Communications*, 10(1), 636217. <https://doi.org/10.1038/s41467-019-13835-6>
- 563 Wang, C.-H., Balasubramanian, M. K., & Dokland, T. (2004). Structure, crystal packing and  
564        molecular dynamics of the calponin-homology domain of *Schizosaccharomyces pombe*  
565        Rng2. *Acta Crystallographica Section D Biological Crystallography*, 60(8), 1396–1403.  
566        <https://doi.org/10.1107/S09074444904012983>
- 567 Way, M., Sanders, M., Garcia, C., Sakai, J., & Matsudaira, P. (1995). Sequence and domain  
568        organization of scruin, an actin-cross-linking protein in the acrosomal process of  
569        *Limulus* sperm. *Journal of Cell Biology*, 128(1–2), 51–60.
- 570 Xu, K., Zhong, G., & Zhuang, X. (2013). Actin, spectrin, and associated proteins form a  
571        periodic cytoskeletal structure in axons. *Science (New York, N. Y.)*, 339(6118), 452–  
572        456. <https://doi.org/10.1126/science.1232251>
- 573  
574  
575  
576  
577  
578  
579  
580

## Figure 1

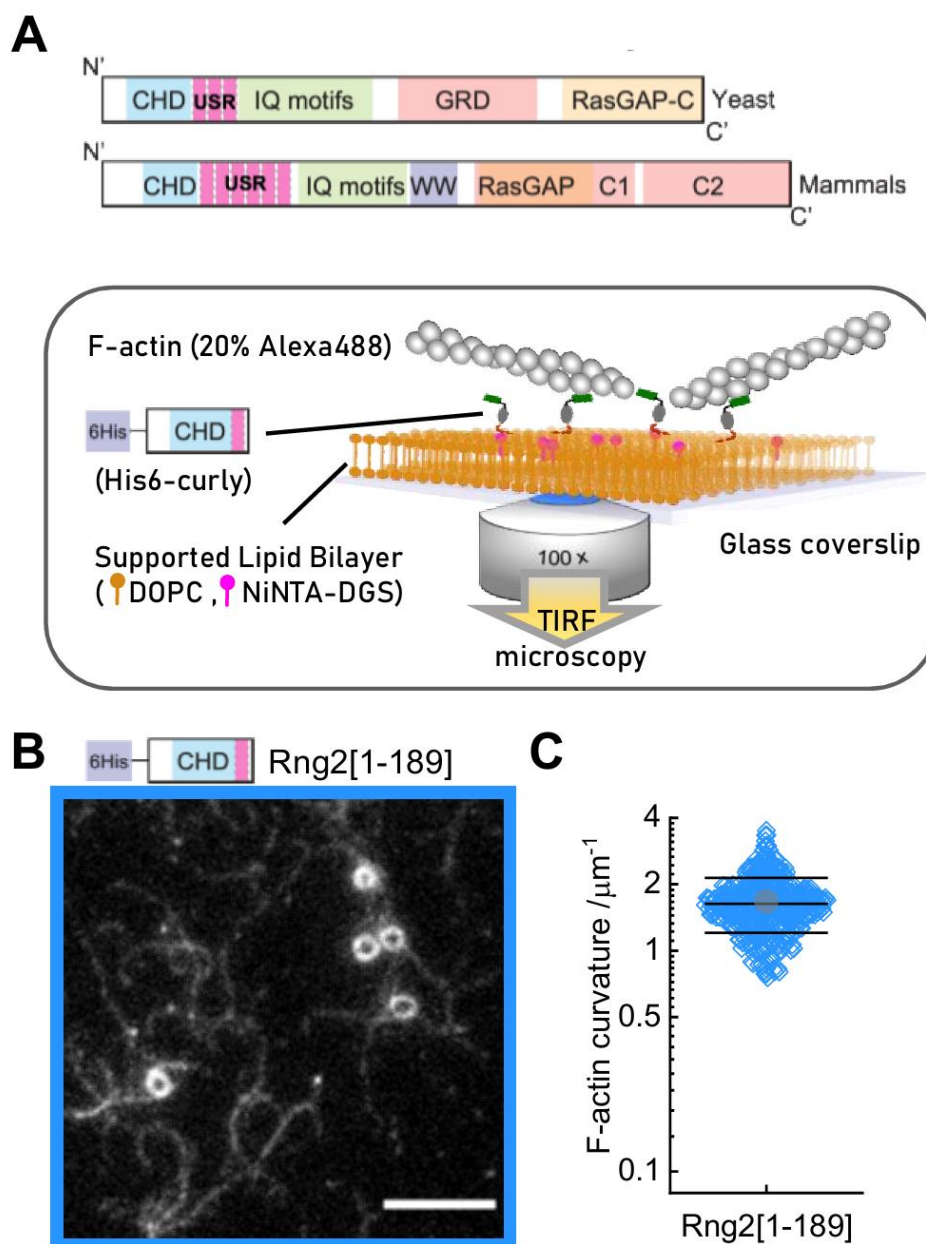

581  
 582 **Figure 1 – Formation of actin filament rings by membrane tethered curly (Rng2[1-189])**  
 583 (A) Schematic representation of (top) the IQGAP proteins Rng2 (yeast, *S. pombe*) and  
 584 IQGAP1 (mammals, *H. Sapiens*) and (bottom) the experimental setup used in this study;  
 585 CHD - Calponin Homology Domain, USR – Unstructured Region, GRD - GAP Related  
 586 Domain, RasGAP – Ras GTPase Activating Protein, WW – tryptophan containing protein  
 587 domain.  
 588 (B) TIRF microscopy image of actin filaments (Alexa488) bound to SLB tethered His<sub>6</sub>-curly;  
 589 scale bar 5 μm.  
 590 (C) Curvature measurements of actin filament rings and curved segments; shown are the  
 591 individual data points and their mean ± s.d.; N = 425 obtained from 8 field of views from  
 592 4 individual experiments.

593  
 594

## Figure 1 - figure supplement 1

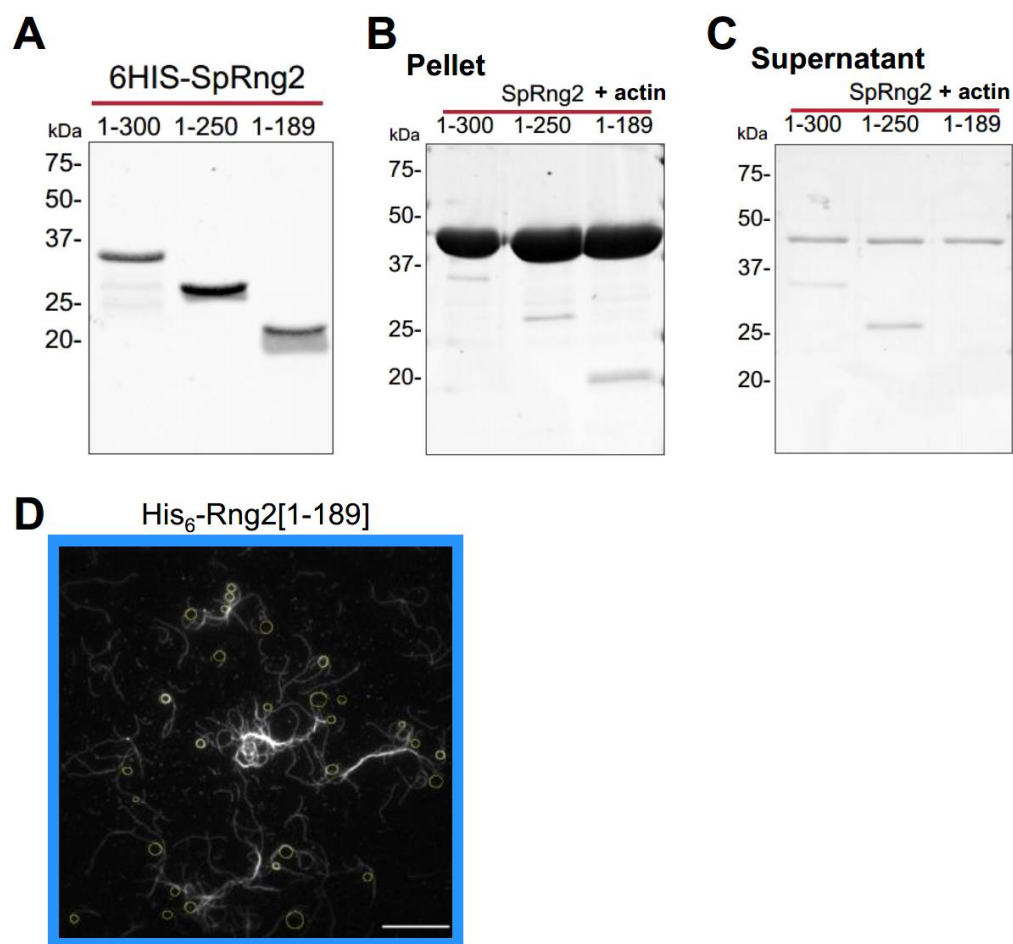

595  
596  
597  
598  
599  
600  
601  
602  
  
603  
604  
605  
606  
607  
608  
609  
610  
611  
612  
613  
614  
615  
616  
617  
618  
619

### Figure 1 - figure supplement 1

- (A) Western blot of the different His<sub>6</sub>-Rng2 constructs after protein purification.  
(B) SDS-PAGE of the actin filament pellet after incubation with His<sub>6</sub>-Rng2 constructs and centrifugation at 100,000g for 20 min at 25°C.  
(C) SDS-PAGE of the supernatant from the sample described in (B).  
(D) TIRF microscopy image of actin filaments (Alexa488) bound to SLB tethered His<sub>6</sub>- curly; circles show curvature measurements; scale bar 10 μm.

## Figure 1 - figure supplement 2

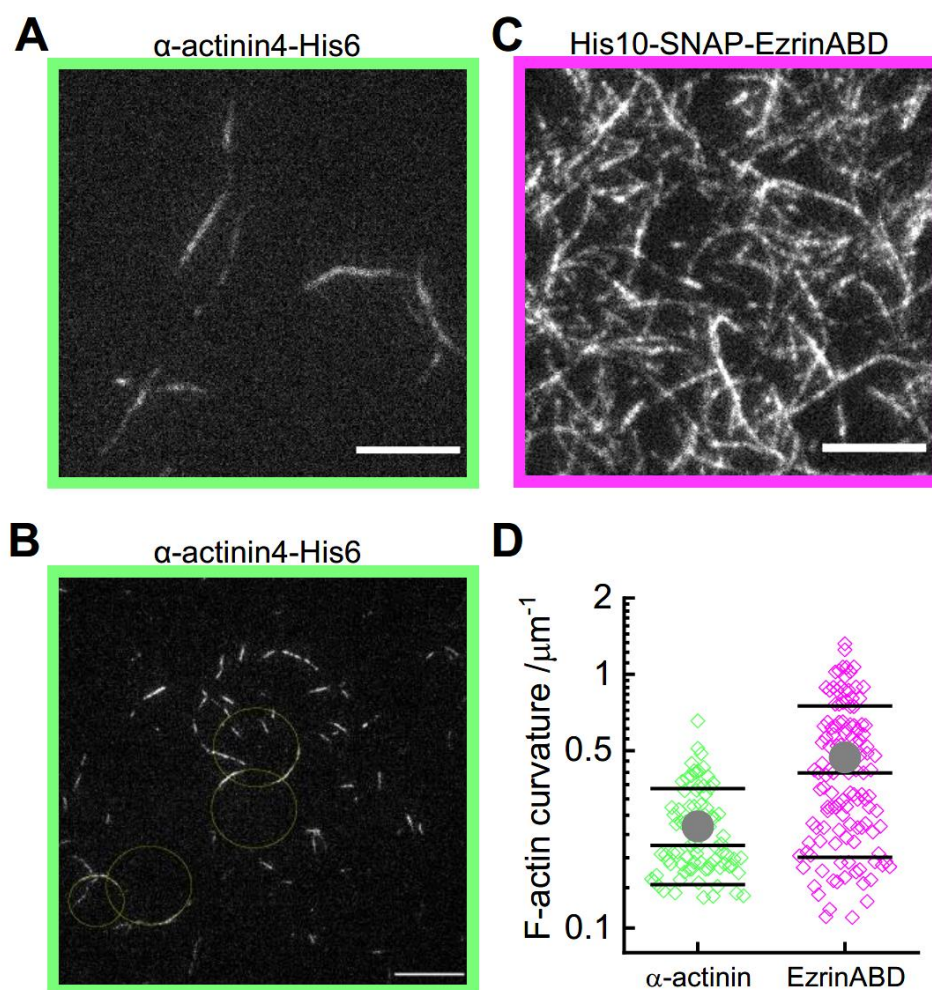

620  
621  
622  
623  
624  
625  
626  
627  
628  
629  
630  
631  
632

### Figure 1-figure supplement 2

- (A) TIRF microscopy image of actin filaments (Alexa488) bound to SLB tethered  $\alpha$ -actinin-His<sub>6</sub>; scale bar 5  $\mu\text{m}$ .  
(B) TIRF microscopy image of actin filaments (Alexa488) bound to SLB tethered  $\alpha$ -actinin-His<sub>6</sub>; circles show curvature measurements; scale bar 10  $\mu\text{m}$ .  
(C) TIRF microscopy image of actin filaments (Alexa488) bound to SLB tethered His<sub>10</sub>-EzrinABD; scale bar 5  $\mu\text{m}$ .  
(D) Curvature measurements of actin filament rings and curved segments; shown are the individual data points and their mean  $\pm$  s.d.;  $\alpha$ -actinin-His<sub>6</sub>: N = 85 obtained from 10 field of views from 4 individual experiments; His<sub>10</sub>-EzrinABD : N = 127 obtained from 9 field of views from 3 individual experiments.

633  
634  
635  
  
636  
637  
638  
639

## Figure 2

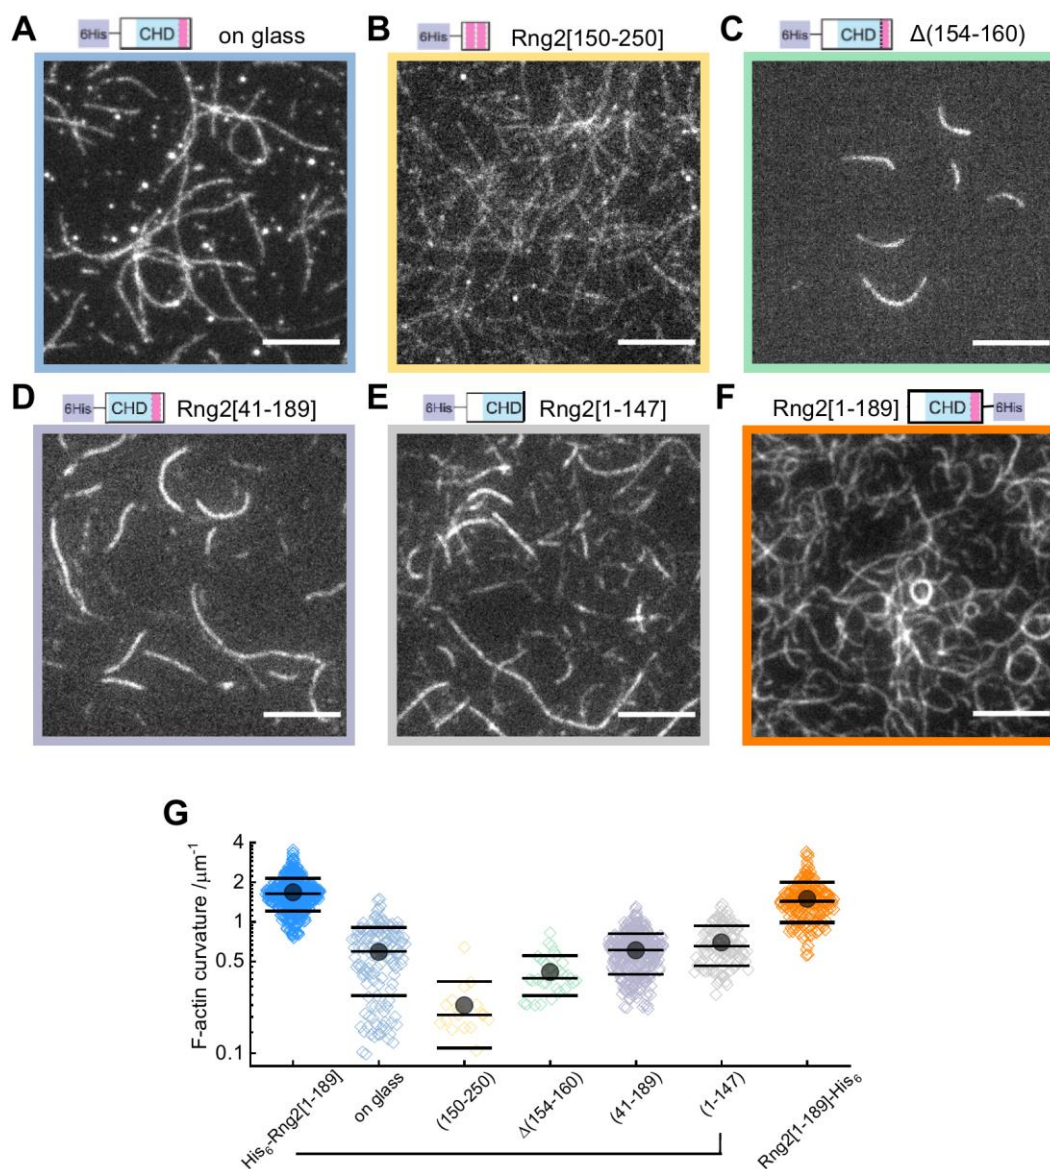

640  
641  
642  
643  
644  
645  
646  
647  
648  
649  
650  
651  
652  
653  
654  
655  
656  
657

### Figure 2 - Characterization of actin binding and bending by fragments of curly

TIRF microscopy images of actin filaments (Alexa488) bound to

- (A) glass adsorbed His<sub>6</sub>-curly; N = 138 from 9 field of views from 3 independent experiments;
  - (B) SLB bound His<sub>6</sub>-Rng2[150-250]; N = 144 from 10 field of views from 2 independent experiments;
  - (C) SLB bound His<sub>6</sub>-Rng2[1-189] $\Delta(154-160)$ ; N = 33 from 10 field of views from 2 independent experiments;
  - (D) SLB bound His<sub>6</sub>-Rng2[41-189]; N = 323 from 9 field of views from 3 independent experiments;
  - (E) SLB bound His<sub>6</sub>-Rng2[1-147]; N = 118 from 12 field of views from 2 experiments;
  - (F) SLB bound Rng2[1-189]-His<sub>6</sub>; N = 658 from 16 field of views from 4 experiments;
- Scale bars: 5  $\mu\text{m}$ .
- (G) Curvature measurements of actin filament rings and curved segments; shown are the individual data points and their mean  $\pm$  s.d.

## Figure 2 - figure supplement 1

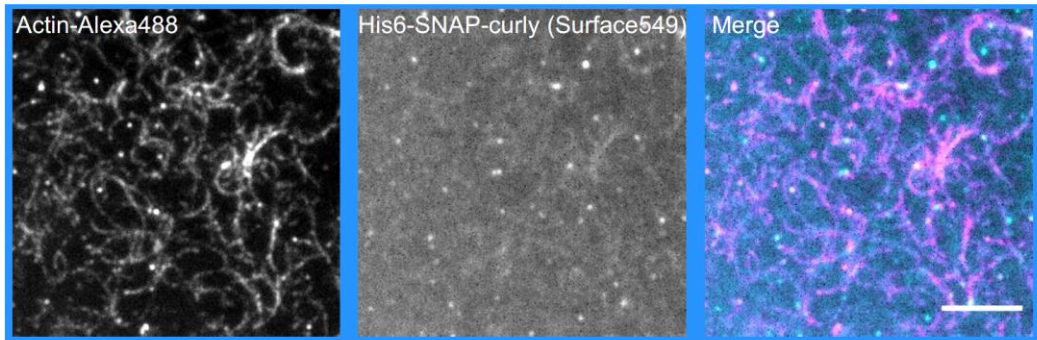

658  
659  
660  
661  
662  
663  
664  
665  
666  
667  
668  
669  
670  
671  
672  
673  
674  
675  
676  
677  
678  
679  
680  
681  
682  
683  
684  
685  
686  
687  
688  
689  
690  
691  
692  
693  
694  
695  
696  
697  
698

### Figure 2- supplement figure 1

Dual color TIRF microscopy image of actin filaments (Alexa488, magenta) bound to SLB tethered fluorescently labelled His<sub>6</sub>-SNAP-curly (Surface549, cyan); scale bar 5  $\mu$ m.

## Figure 2 - figure supplement 2

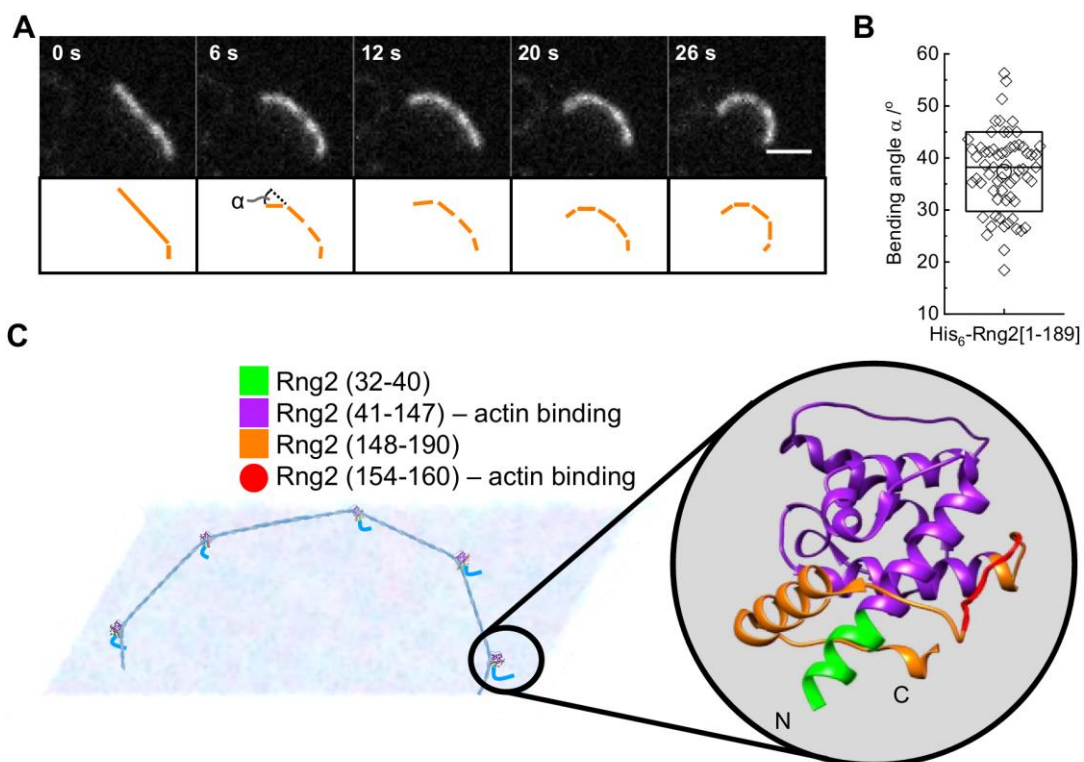

699  
700  
701  
702  
703  
704  
705  
706  
707  
708  
709  
710  
711  
712  
713  
714  
715  
716  
717  
718  
719  
720  
721  
722  
723  
724  
725  
726  
727  
728  
729  
730

### Figure 2- supplement figure 2

- (A) TIRF microscopy image time series of an actin filament (Alexa488) bound to SLB tethered His<sub>6</sub>-curly and displaying stepwise bending; scale bar: 1  $\mu$ m.
- (B) Bending angles of individual bending events in actin filaments; shown are the individual data points and their mean  $\pm$  s.d.; N = 63 from 6 individual actin filaments.
- (C) Model representation of curly and how it could interact with actin to induce local bends in the actin filament; the inset shows curly with the regions tested in this study highlighted in color.



### Figure 3

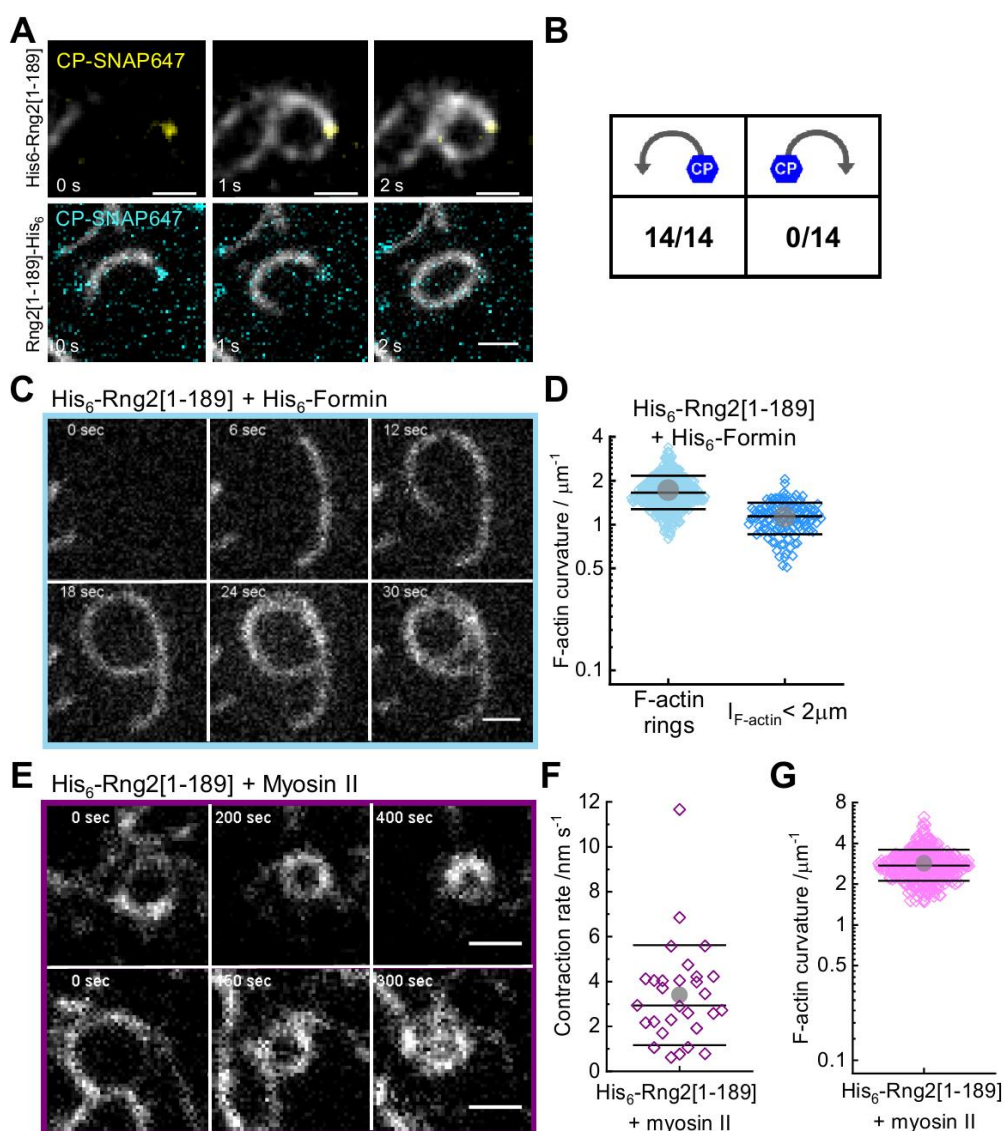

731  
732 **Figure 3 – Curly recognizes actin filament orientation and enables actin ring contraction**  
733 **by myosin II**

734 (A) TIRF microscopy images of actin filaments (Alexa488) with the plus end marked with  
735 SNAP647-tagged capping protein binding to His<sub>6</sub>-curly (top) and curly-His<sub>6</sub> (bottom);  
736 scale bar: 1  $\mu\text{m}$ .  
737 (B) Count of actin filament bending orientations with respect to the capping protein where  
738 individual actin filaments could be identified.  
739 (C) TIRF microscopy images of a polymerizing actin filament (Alexa488) driven by  
740 membrane tethered His<sub>6</sub>-formin in the presence of His<sub>6</sub>-curly; scale bar: 1  $\mu\text{m}$ .  
741 (D) Curvature measurements of actin filament rings (light blue) and curved short actin  
742 filaments (< 2  $\mu\text{m}$ ; dark blue); shown are the individual data points and their mean  $\pm$   
743 s.d.;  $N_{\text{rings}} = 477$ ,  $N_{\text{short}} = 125$  from 9 field of views of 3 independent experiments.  
744 (E) TIRF microscopy images of actin filament (Alexa488) ring contraction after addition of  
745 muscle myosin II filaments on His<sub>6</sub>-curly containing SLBs; scale bar: 1  $\mu\text{m}$ .  
746 (F) Average contraction rates of actin filament rings after addition of muscle myosin II  
747 filaments; shown are the individual data points and their mean  $\pm$  s.d.;  $N = 18$  from 2  
748 individual experiments.  
749 (G) Curvature measurements of actin filament rings and curved segments 20 min after  
750 addition of myosin II filaments; shown are the individual data points and their mean  $\pm$   
751 s.d.;  $N = 342$  from 10 field of views of 2 individual experiments.

## Figure 3 - figure supplement 1

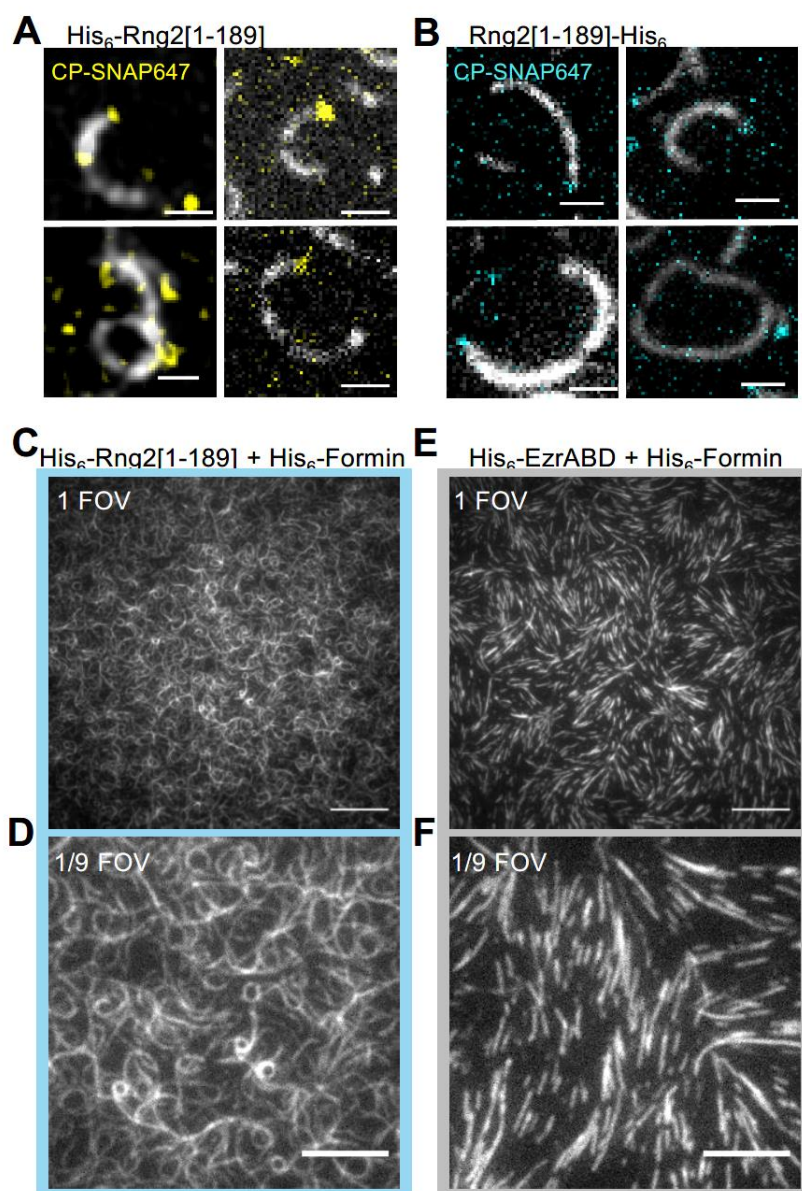

752  
753  
754  
755  
756  
757  
758  
759  
760  
761  
762  
763  
764  
765  
766  
767  
768  
769  
770  
771

### Figure 3-figure supplement 1

- (A) TIRF microscopy images of actin filaments (Alexa488) with the plus end marked with SNAP647-tagged capping protein binding to His<sub>6</sub>-curly; scale bar: 1 μm.
- (B) TIRF microscopy images of actin filaments (Alexa488) with the plus end marked with SNAP647-tagged capping protein binding to curly- His<sub>6</sub>; scale bar: 1 μm.
- (C) TIRF microscopy image (representing one field of view) of actin filaments (Alexa488) polymerized by membrane tethered His<sub>6</sub>-formin in the presence of His<sub>6</sub>-curly; scale bar: 10 μm.
- (D) TIRF microscopy image (representing 1/9 of the field of view) of actin filaments (Alexa488) polymerized by membrane tethered His<sub>6</sub>-formin in the presence of His<sub>6</sub>-curly; scale bar: 5 μm.
- (E) TIRF microscopy image (representing one field of view) of actin filaments (Alexa488) polymerized by membrane tethered His<sub>6</sub>-formin in the presence of His<sub>10</sub>-EzrinABD; scale bar: 10 μm.
- (F) TIRF microscopy image (representing 1/9 of the field of view) of actin filaments (Alexa488) polymerized by membrane tethered His<sub>6</sub>-formin in the presence of His<sub>10</sub>-EzrinABD; scale bar: 5 μm.

## Figure 3 - figure supplement 2

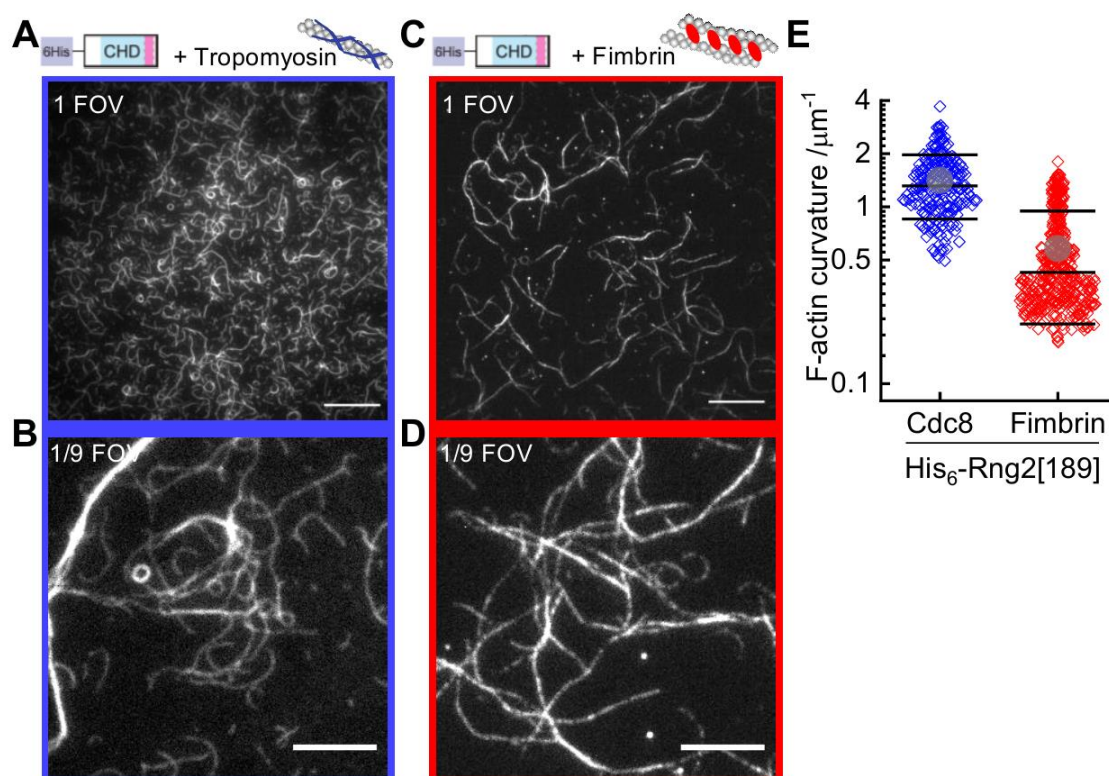

772  
773  
774  
775  
776  
777  
778  
779  
780  
781  
782  
783  
784  
785  
786  
787  
788  
789  
790  
791  
792  
793  
794  
795  
796  
797  
798  
799  
800  
801

### Figure 3-figure supplement 2

- (A) TIRF microscopy image (representing one field of view) of actin filaments (Alexa488) pre-incubated with tropomyosin (Cdc8) bound to membrane tethered His<sub>6</sub>-curly; scale bar: 10 μm.
- (B) TIRF microscopy image (representing 1/9 field of view) of actin filaments (Alexa488) pre-incubated with tropomyosin (Cdc8) bound to membrane tethered His<sub>6</sub>-curly; scale bar: 5 μm.
- (C) TIRF microscopy image (representing one field of view) of actin filaments (Alexa488) pre-incubated with fimbrin bound to membrane tethered His<sub>6</sub>-curly; scale bar: 10 μm.
- (D) TIRF microscopy image (representing 1/9 field of view) of actin filaments (Alexa488) pre-incubated with fimbrin bound to membrane tethered His<sub>6</sub>-curly; scale bar: 5 μm.
- (E) Curvature measurements of actin filament rings and curved segments; shown are the individual data points and their mean ± s.d.; tropomyosin (Cdc8, blue): N = 204 from 9 field of views of 3 individual experiments; fimbrin (red): N = 407 from 20 field of views of 3 individual experiments.

## Figure 3 - figure supplement 3

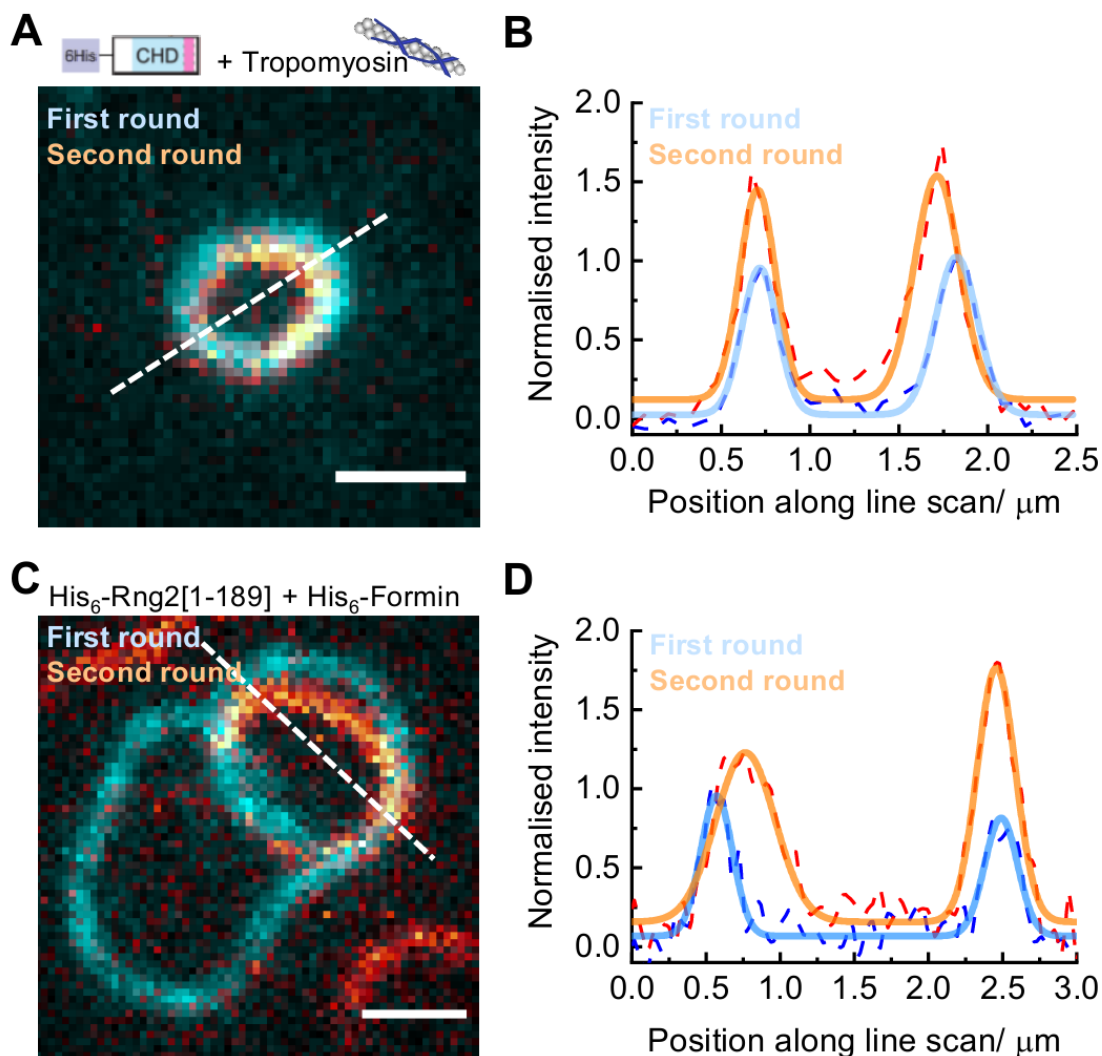

802  
803  
804  
805  
806  
807  
808  
809  
810  
811  
812  
813  
814  
815  
816  
817  
818  
819  
820  
821  
822  
823  
824

### Figure 3-figure supplement 3

- (A) TIRF microscopy image overlay showing multiple ring formation of a tropomyosin coated actin filament (Alexa488) during binding to membrane tethered His<sub>6</sub>-curly; the first ring formed is colored in cyan, the second ring (in orange) was highlighted by subtracting the image of the first ring from the image stack; scale bar: 1 μm.
- (B) Intensity line scan (3 pixels width) along the dashed line in (A) and corresponding Gaussian peak fits.
- (C) TIRF microscopy image overlay showing multiple ring formation of a polymerizing actin filament (Alexa488) by membrane tethered His<sub>6</sub>-formin in presence of membrane tethered His<sub>6</sub>-curly; the first ring formed is colored in cyan, the second ring (in orange) was highlighted by subtracting the image of the first ring from the image stack; scale bar: 1 μm.
- (D) Intensity line scan (3 pixels width) along the dashed line in (C) and corresponding Gaussian peak fits.

### Figure 3 - figure supplement 4

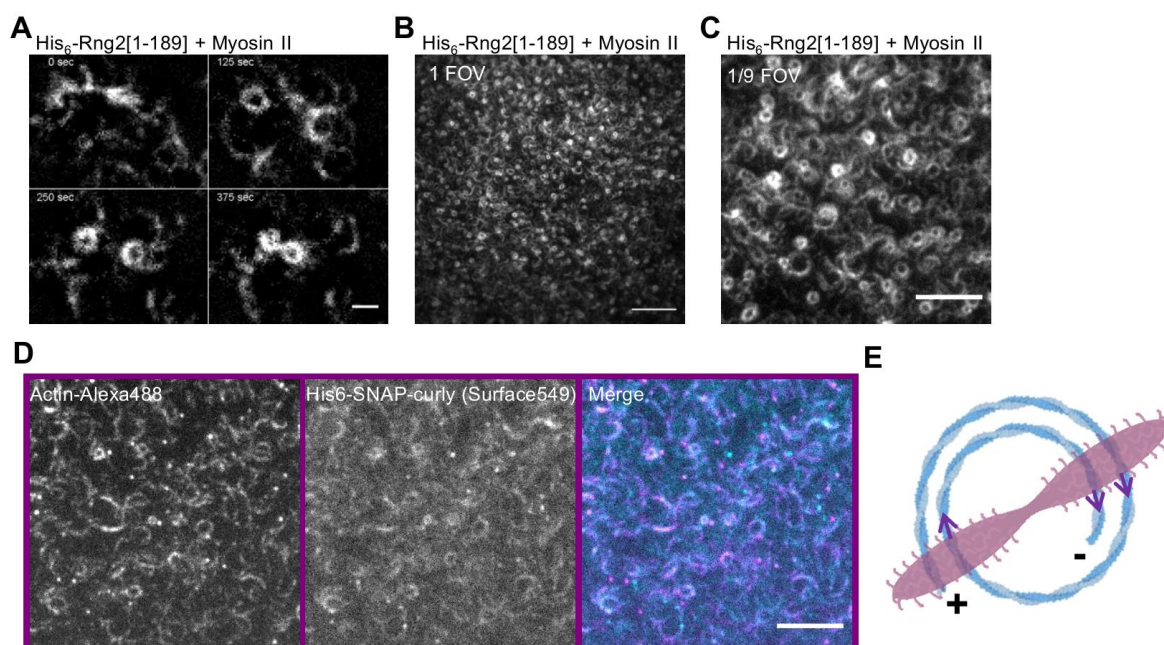

825  
826  
827  
828  
829  
830  
831  
832  
833  
834  
835  
836  
837  
838  
839  
840  
841  
842  
843  
844  
845  
846  
847  
848  
849  
850  
851  
852  
853  
854  
855  
856  
857  
858  
859  
860  
861

#### Figure 3-figure supplement 4

- (A) TIRF microscopy image time series showing actin filament (Alexa488) ring formation, translation and contraction driven by myosin II filaments when bound to membrane tethered His<sub>6</sub>-curly; scale bar: 1  $\mu$ m.
- (B) TIRF microscopy image (representing one field of view) of actin filaments (Alexa488) 20 min after addition of muscle myosin II filaments on His<sub>6</sub>-curly containing SLBs; scale bar: 10  $\mu$ m.
- (C) TIRF microscopy image (representing one field of view) of actin filaments (Alexa488) 20 min after addition of muscle myosin II filaments on His<sub>6</sub>-curly containing SLBs; scale bar: 5  $\mu$ m.
- (D) Dual color TIRF microscopy image of actin filaments (Alexa488, magenta) bound to membrane tethered fluorescently labelled His<sub>6</sub>-SNAP-curly (Surface549, cyan) 20 min after addition of myosin II filaments; scale bar 5  $\mu$ m.
- (E) Model representing how myosin II filaments could drive the contraction of curly formed actin rings.

## Figure 4

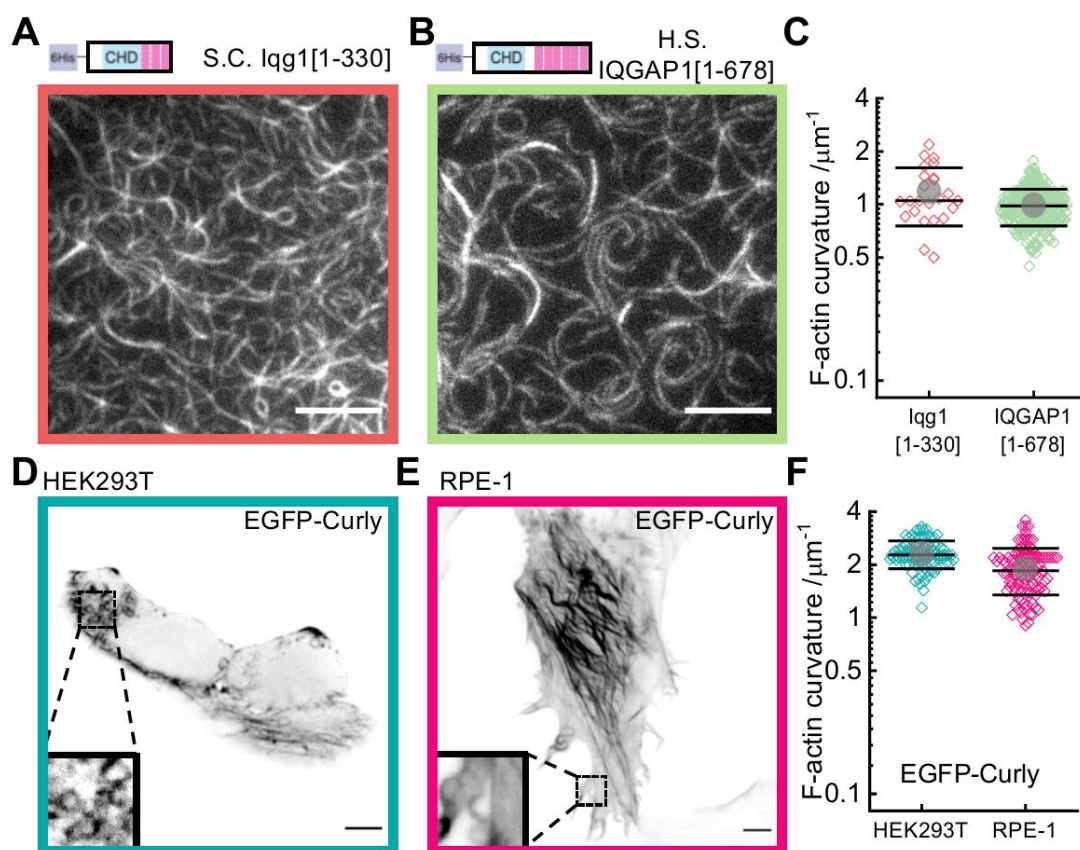

862  
863  
864  
865  
866  
867  
868  
869  
870  
871  
872  
873  
874  
875  
876  
877  
878  
879  
880  
881  
882  
883  
884  
885  
886  
887  
888  
889  
890  
891

### Figure 4 – Curly effect is conserved among species and it can foster actin bending in mammalian cells

- (A) TIRF microscopy image of actin filaments (Alexa488) bound to membrane tethered His6-Iqg1[1-330] (*S. cerevisiae*); scale bar: 5  $\mu\text{m}$ .
- (B) TIRF microscopy image of actin filaments (Alexa488) bound to membrane tethered His6-IQGAP1[1-678] (*H. sapiens*); scale bar: 5  $\mu\text{m}$ .
- (C) Curvature measurements of actin filament rings and curved segments; shown are the individual data points and their mean  $\pm$  s.d.; Iqg1[1-330] (orange): N = 167 from 12 field of views of 4 individual experiments; IQGAP1[1-678] (green): N = 407 from 20 field of views of 3 individual experiments.
- (D) Confocal microscopy image (average intensity projection of the basal cell section) of a HEK293T cell transfected with EGFP-Curly, inlet shows zoom of dashed box; scale bar: 5  $\mu\text{m}$ .
- (E) Confocal microscopy image (average intensity projection of the basal cell section) of a REP-1 cell transfected with EGFP-Curly, inlet shows zoom of dashed box; scale bar: 5  $\mu\text{m}$ .
- (F) Curvature measurements of actin filament rings and curved segments found in EGFP-Curly expressing cells; shown are the individual data points and their mean  $\pm$  s.d.; HEK293T (teal): N 91 from 14 cells of 2 individual experiments; REP-1 (fuchsia): N = 113 from 11 cells of 2 individual experiments.

## Figure 4 – figure supplement 1

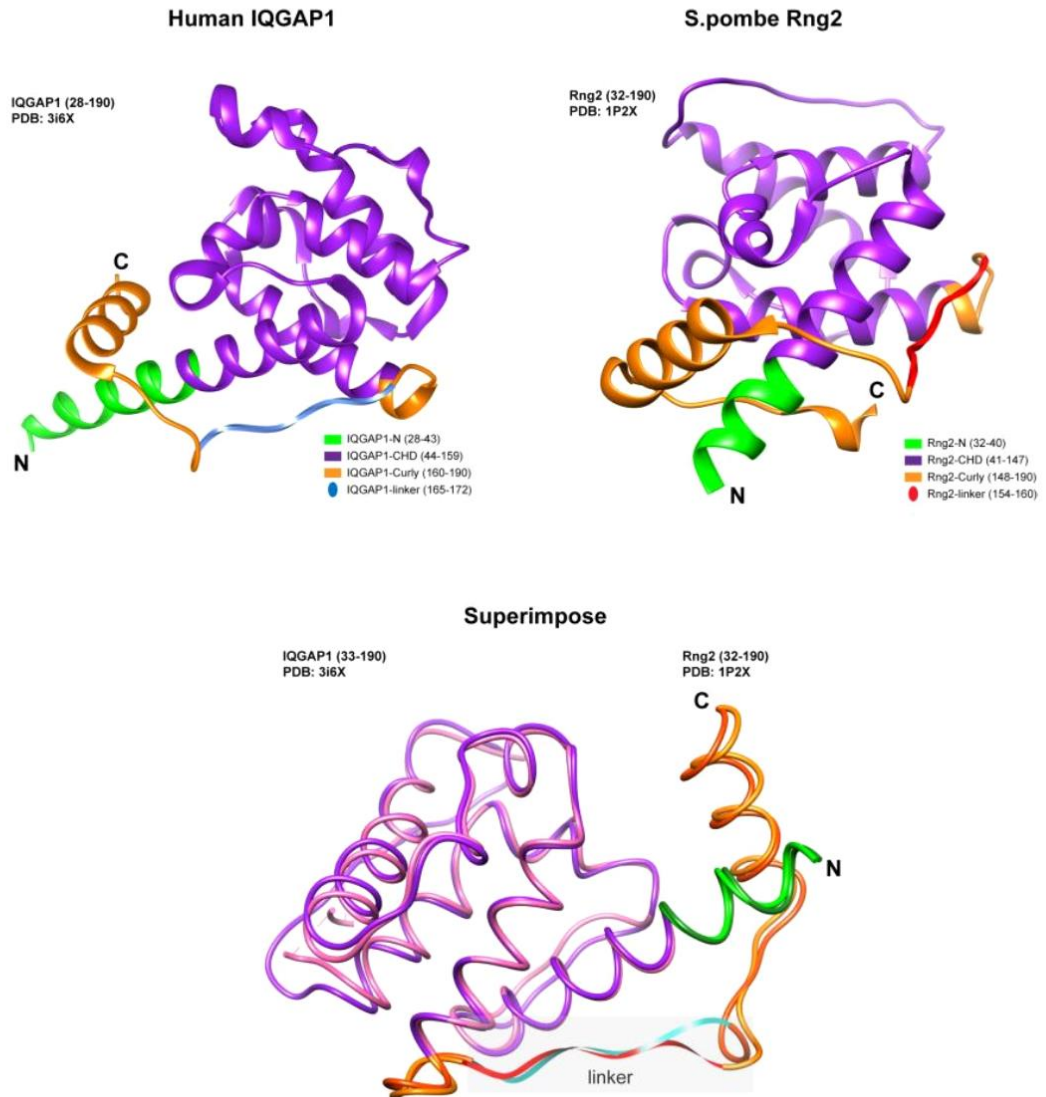

892  
893  
894  
895  
896  
897  
898  
899  
900  
901  
902  
903  
904  
905  
906  
907  
908  
909  
910  
911  
912  
913

### Figure 4-figure supplement 1

Depiction of structure predictions and overlay of *H. sapiens* IQGAP1[28-190] and *S. pombe* Rng2[32-190] indicating the strong similarity between the linker regions of both proteins that are thought to be important for actin bending.

## Figure 4 – figure supplement 2

A

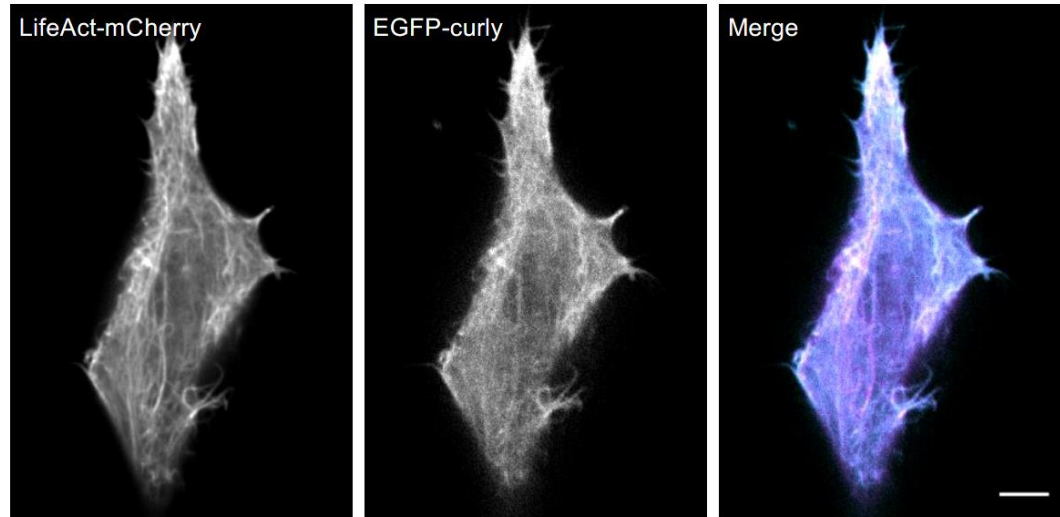

914

915

916

### Figure 4-figure supplement 2

917 Dual color confocal microscopy image (average intensity projection of the basal cell section) of a

918 HEK293T cell transfected with LifeAct-mCherry (magenta) and EGFP-Curly (cyan); scale bar: 5

919  $\mu\text{m}$ .

920

921

922

923

924

925

926

927

928

929

930

931

932

933

934

935

936

937

938

939

940

941

942

943

944

945

946

947

948

949

950

951



952 **Video captions**

953

954 Video 1: TIRF microscopy image sequence of actin filaments (Alexa488) landing on His<sub>6</sub>-  
955 curly decorated SLBs; scale bar: 5 μm.

956

957 Video 2: Example image sequence of an actin filament (Alexa488) bound to a His<sub>6</sub>-curly  
958 decorated SLB displaying individual bending events after processing the image sequence  
959 with a Sobel filter to highlight the shape of the actin filament (the unprocessed images are  
960 shown in Figure 2-figure supplement 2); scale bar: 1 μm.

961

962 Video 3: Example image sequence of an actin filament (Alexa488, gray) with the plus end  
963 labelled by capping protein (SNAP647, yellow) landing on a His<sub>6</sub>-curly decorated SLB; scale  
964 bar: 1 μm.

965

966 Video 4: Example image sequence of an actin filament (Alexa488, gray) with the plus end  
967 labelled by capping protein (SNAP647, cyan) landing on a curly-His<sub>6</sub> decorated SLB; scale  
968 bar: 1 μm.

969

970 Video 5: Example image sequences of actin filaments (Alexa488) polymerized by SLB  
971 tethered formin in the presence of His<sub>6</sub>-curly bound to the SLB; scale bar 1 μm.

972

973 Video 6: Example image sequences of actin filaments (Alexa488) decorated with  
974 tropomyosin binding to membrane tethered His<sub>6</sub>-curly; scale bar: 1 μm.

975

976 Video 7: Example image sequence showing formation, translation, and contraction of actin  
977 filament (Alexa488) rings on membrane tethered His<sub>6</sub>-curly after the addition of muscle  
978 myosin II filaments; scale bar: 1 μm.

979

980 Video 8: Example image sequences of actin filament (Alexa488) ring contraction on  
981 membrane tethered His<sub>6</sub>-curly after the addition of muscle myosin II filaments; scale bar: 1  
982 μm.

983

984

985

986

987

988

989

990

991

992

993

994

995

996

997

998

999

1000

1001

1002

1003

1004

1005

1006

1007

1008

1009

1010  
1011  
1012  
1013  
1014  
1015

**Table 1: Plasmids used in this study**

|                                                                                            |                                           |
|--------------------------------------------------------------------------------------------|-------------------------------------------|
| pET28C-6HIS-Rng2(1-189)                                                                    | pSPW153                                   |
| pET28C-6HIS-Rng2(1-250)                                                                    | pSPW155                                   |
| pET28C-6HIS-Rng2(1-300)                                                                    | pSPW113                                   |
| pET28C-6HIS-Rng2(1-147)                                                                    | pSPW167                                   |
| pET28C-6HIS-Rng2(41-147)                                                                   | pSPW169                                   |
| pET28C-6HIS-Rng2 (41-189)                                                                  | pSPW187                                   |
| pET28C-6HIS-Rng2 (41-250)                                                                  | pSPW189                                   |
| pET28C-6HIS-Rng2 (41-300)                                                                  | pSPW191                                   |
| pETMCN-Rng2(1-189)-C-6HIS                                                                  | pSPW288                                   |
| pETMCN-Rng2(1-250)-C-6HIS                                                                  | pSPW290                                   |
| pETMCN-Rng2(1-300)-C-6HIS                                                                  | pSPW291                                   |
| pET28C-6HIS-Rng2(1-189; $\Delta$ 154-160)                                                  | pSPW297                                   |
| pET28C-6HIS-Rng2(1-300; $\Delta$ 154-160)                                                  | pSPW299                                   |
| pET28C-6HIS-Curly100 (150-250)                                                             | pSPW284                                   |
| pET23a-10HIS-SNAP-Rng2-CHD (1-300)                                                         | pSPW195                                   |
| pET28C-6HIS-Sclqg1 (1-330)                                                                 | pSPW200                                   |
| pET28C-6HIS-HslIQGAP1 (1-678)                                                              | pSPW293                                   |
| pCDNA3-EGFP-GSGG-Rng2(1-189)                                                               | pSPW620                                   |
| pET-3d-6HIS-SNAP-tagged $\beta$ 1 subunit and untagged $\alpha$ 1 subunits of chicken CapZ | Addgene: 69948<br>Bombardier et al., 2015 |
| pET28C-6HIS-Cdc12 (740-1391)                                                               | pSPW123                                   |
| pETMCN-AScdc8                                                                              | pSPW036                                   |
| pGEX4T1-GST-Fim1                                                                           | pSPW114                                   |
| pET23a-10HIS-SNAP-Ezrin-ABD                                                                | pSPW151                                   |
| pGEX-alpha actinin4 (acnt4)                                                                | Gift from L. Blanchoin's lab              |

1016  
1017  
1018  
1019  
1020  
1021  
1022  
1023  
1024  
1025
